# Supplementary material for: Efficacy of nanocurcumin supplementation on insulin resistance, lipids, inflammatory factors and nesfatin among obese patients with non-alcoholic fatty liver disease (NAFLD): a trial protocol
Source: PubMed Central journal article supplement — BMJ Open. 2017 Jul 10;7(7):e016914. doi: 10.1136/bmjopen-2017-016914 (PMC5726126; doi:10.1136/bmjopen-2017-016914), 2017-07-10
Supplement: bmjopen-2017-016914.draft_revisions.pdf [file bmjopen-2017-016914.draft_revisions.pdf]

# BMJ Open

## The Efficacy of Nanocurcumin Supplementation on Insulin Resistance, Lipids, Inflammatory Factors and Nesfatin among Obese Patients with Non-Alcoholic Fatty Liver Disease (NAFLD): A Trial Protocol

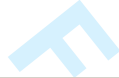

|                                 |                                                                                                                                                                                                                                                                                                                                                                                                                                                                                                                                                                                                                                                                                                                                                                                                                                                                                                                                                         |
|---------------------------------|---------------------------------------------------------------------------------------------------------------------------------------------------------------------------------------------------------------------------------------------------------------------------------------------------------------------------------------------------------------------------------------------------------------------------------------------------------------------------------------------------------------------------------------------------------------------------------------------------------------------------------------------------------------------------------------------------------------------------------------------------------------------------------------------------------------------------------------------------------------------------------------------------------------------------------------------------------|
| Journal:                        | <i>BMJ Open</i>                                                                                                                                                                                                                                                                                                                                                                                                                                                                                                                                                                                                                                                                                                                                                                                                                                                                                                                                         |
| Manuscript ID                   | bmjopen-2017-016914                                                                                                                                                                                                                                                                                                                                                                                                                                                                                                                                                                                                                                                                                                                                                                                                                                                                                                                                     |
| Article Type:                   | Protocol                                                                                                                                                                                                                                                                                                                                                                                                                                                                                                                                                                                                                                                                                                                                                                                                                                                                                                                                                |
| Date Submitted by the Author:   | 09-Apr-2017                                                                                                                                                                                                                                                                                                                                                                                                                                                                                                                                                                                                                                                                                                                                                                                                                                                                                                                                             |
| Complete List of Authors:       | Jazayeri-Tehrani, Seyed Ali; Tehran University of Medical Sciences, Department of Clinical Nutrition<br>Rezayat, Seyed Mehdi; Tehran University of Medical Sciences (TUMS), Department of Pharmacology, School of Medicine, Member of Medical Nanotechnology Department, School of Advanced Sciences and Technology in Medicine<br>Mansouri, Siavash; National Iranian Oil Company (NIOC), Central Hospital Qorbani, Mostafa; Non communicable Diseases Research Center, Endocrinology and Metabolism Population Sciences Institute, Tehran University of Medical Sciences,<br>Alavian, SM; Baqiyatollah University of Medical Sciences, Tehran, Iran, Baqiyatallah Research Center for Gastroenterology and Liver Diseases (BRCGL)<br>Daneshi-Maskooni, Milad; Tehran University of Medical Sciences, Department of Community Nutrition<br>Hosseinzadeh-Attar, Mohammad Javad; Tehran University of Medical Sciences, Department of Clinical Nutrition |
| <b>Primary Subject Heading</b>: | Nutrition and metabolism                                                                                                                                                                                                                                                                                                                                                                                                                                                                                                                                                                                                                                                                                                                                                                                                                                                                                                                                |
| Secondary Subject Heading:      | Gastroenterology and hepatology, Complementary medicine                                                                                                                                                                                                                                                                                                                                                                                                                                                                                                                                                                                                                                                                                                                                                                                                                                                                                                 |
| Keywords:                       | Nanocurcumin, Non-Alcoholic Fatty Liver Disease, Trial Protocol, Overweight, Obesity                                                                                                                                                                                                                                                                                                                                                                                                                                                                                                                                                                                                                                                                                                                                                                                                                                                                    |
|                                 |                                                                                                                                                                                                                                                                                                                                                                                                                                                                                                                                                                                                                                                                                                                                                                                                                                                                                                                                                         |

SCHOLARONE™  
Manuscripts

# The Efficacy of Nanocurcumin Supplementation on Insulin Resistance, Lipids, Inflammatory Factors and Nesfatin among Obese Patients with Non-Alcoholic Fatty Liver Disease (NAFLD): A Trial Protocol

**Running title:** Nanocurcumin in NAFLD Patients: Trial Protocol

Seyed Ali Jazayeri-Tehrani<sup>1</sup>, Seyed Mehdi Rezayat<sup>2</sup>, Siavash Mansouri<sup>3</sup>, Mostafa Qorbani<sup>4</sup>, Seyed Moayed Alavian<sup>5</sup>, Milad Daneshi-Maskooni<sup>6</sup>, Mohammad-Javad Hosseinzadeh-Attar<sup>7\*</sup>

1. MD, PhD Candidate in Nutritional Sciences, Department of Clinical Nutrition, School of Nutritional Sciences and Dietetics, Tehran University of Medical Sciences, Tehran, Iran. Email: [ajazayeri@farabi.tums.ac.ir](mailto:ajazayeri@farabi.tums.ac.ir)
2. Pharm.D, PhD, Professor of Pharmacology and Toxicology, Department. of Pharmacology, School of Medicine, Member of Medical Nanotechnology Department, School of Advanced Sciences and Technology in Medicine, Tehran University of Medical Sciences (TUMS), Tehran, Iran. Email: [rezayat@tums.ac.ir](mailto:rezayat@tums.ac.ir), Phone: +989124708873, Telefax: +982122002040
3. MD, Gastroenterohepatologist, Assistant Professor, National Iranian Oil Company (NIOC) Central Hospital, Tehran, Iran. Email: [siavash.mansouri@gmail.com](mailto:siavash.mansouri@gmail.com)
4. PhD, Assistant Professor, Non-Communicable Diseases Research Center, Alborz University of Medical Sciences, Karaj, Iran. Email: [mqorbani1379@yahoo.com](mailto:mqorbani1379@yahoo.com)
5. MD, Hepatologist, Professor, Baqiyatallah Research Center for Gastroenterology and Liver Diseases (BRCGL), Baqiyatallah University of Medical Sciences, Tehran, Iran. Email: [alavian@thc.ir](mailto:alavian@thc.ir)
6. PhD Candidate in Nutritional Sciences, Department of Community Nutrition, School of Nutritional Sciences and Dietetics, Tehran University of Medical Sciences, Tehran, Iran. Email: [mi-daneshi@razi.tums.ac.ir](mailto:mi-daneshi@razi.tums.ac.ir)
7. **\*Corresponding Author**, Associate Professor, MD, PhD, Department of Clinical Nutrition, School of Nutritional Sciences and Dietetics, Tehran University of Medical Sciences, No.44, Hojjatdoust Alley, Naderi Ave, Keshavarz Blvd, Tehran, Iran. Email: [mhosseinzadeh@tums.ac.ir](mailto:mhosseinzadeh@tums.ac.ir), Phone: +989123717305, Telefax: +98-21-88974462

## Abstract

**Objectives:** Different studies have been conducted on curcumin roles in health with multiple properties including antioxidant and anti-inflammatory effects. Due to lack of studies regarding curcumin effects on obese NAFLD patients, our protocol is designed to assess the impact of nano-curcumin on blood sugar, lipids, inflammatory indexes, insulin resistance, and liver function, especially by nesfatin.

**Setting:** This trial will be conducted in a central hospital of Tehran, Iran. The level of care is primary.

**Participants:** 84 obese NAFLD patients diagnosed using ultrasonography will be employed according to the eligibility criteria.

**Interventions:** The patients will be randomly divided into two equal groups with nanocurcumin or placebo supplements. Also, the lifestyle changes (low-calorie diet and physically active) will be advised. After the enrollment, intervention will begin for 3 months.

**Primary and Secondary Outcome Measures:** The general, 24-hr food-recall (at beginning-middle-end), and short-form international physical activity (IPAQ, at beginning and end) questionnaires will be completed. The blood pressure, anthropometrics, serum sugar (fasting blood sugar and insulin (FBS, FBI), glycosylated hemoglobin (HbA1c)), lipids (triglycerid (TG), total cholesterol (TC), low and high density lipoprotein-cholesterol (LDL-c, HDL-c)), and inflammatory profiles (interleukin-6 (IL-6), tumor necrosis factor-alpha (TNF- $\alpha$ )), liver function (alanine and aspartate transaminase (ALT, AST)), insulin resistance and sensitivity indices, and nesfatin will be measured at the beginning and end of study.

**Conclusions:** This trial is the first that will determine efficacy of nanocurcumin on certain blood factors among obese patients with NAFLD. It is required to study the potential consequences of curcumin in various diseases especially NAFLD to be used clinically.

**Trial registration:** The Ethics Committee of Tehran University of Medical Sciences approved our protocol (IR.TUMS.REC.1395.2612). A written informed consent form will be dated by subjects in the beginning. The characteristics of trial registration at Iranian Registry of Clinical Trials (IRCT) are IRCT2016071915536N3 and 27/12/2015.

## Article Summary

### Strengths and limitations of this study:

- randomized double blinded design and protocol publication
- determining dietary intake and physical activity status and registering patient-reported possible problems
- selecting a single policlinic and slow recruiting of patients due to the eligibility criteria
- self-reporting of diet and physical activity status and lack of cooperation of some participants to complete the intervention

**Keywords:** *Nanocurcumin, Non-Alcoholic Fatty Liver Disease, Trial Protocol, Overweight, Obesity*

## Introduction

Non-alcoholic fatty liver disease (NAFLD) occurs when triglyceride is deposited in liver cells (5% <) [Sherlock and Dooley, 2002]. Three degrees of NAFLD are mild (<33% fat accumulation), moderate (33-66% fat accumulation), and severe (>66% fat accumulation) [Sass et al., 2005]. The standard method of diagnosis is liver biopsy. Since biopsy is an invasive method, non-invasive diagnostic methods such as ultrasound, CT scan, and MRI are mostly used. However, exact differentiation between the disease stages by these techniques is difficult. Most of NAFLD patients are identified implicitly in medical examinations by elevated liver enzymes (Aminotransferases: ALT and AST about 1.5 to 2 times higher than normal level). According to recent studies, many patients with advanced non-alcoholic steatohepatitis (NASH) and even cirrhosis can have normal liver enzymes level [Angulo, 2002; Wei et al., 2008; Dowman et al., 2011; Harrison, 2012]. Thus, the prevalence of NAFLD is probably more than the reported one. The symptoms of NAFLD often include fatigue and discomfort in the right upper quarter of abdomen. The average of prevalence in adults is about 30 % (in obese (BMI $\geq$ 25) and non-obese (BMI<25) patients nearly 65-85% and 15-20%, respectively) [Angulo, 2002; Amirkalali et al., 2014; Bagheri Lankarani et al., 2013; Karimi-Sari et al., 2015; Adibi et al., 2013]. NAFLD is more common in men. Disease pathology is a two-phase event including fat reposition in hepatocytes following hepatic steatosis and NASH. Insulin resistance has a key role in both phases, and oxidative stress and pro-inflammatory cytokines are major irritants [Sahebkar, 2011]. Common causes of macrovascular steatosis include insulin resistance, increasing blood insulin levels, central obesity, diabetes type 2, medications (glucocorticoid, estrogen, tamoxifen, amiodarone), nutrition status (starvation, protein deficiency, choline deficiency), liver diseases (Wilson's disease, chronic hepatitis C-III), Hindi child cirrhosis, and jejunum bypass [Harrison, 2012]. The liver fat content is directly related to insulin resistance. Activation of nuclear factor kappa-light-chain-enhancer of activated B cells (NF- $\kappa$ B) upregulates the production of pro-inflammatory cytokines that influence the insulin activity. So, inflammation, adipokines, oxidative stress, or lipid metabolites can change the insulin sensitivity, but intrahepatic fat content is not necessarily directly related to them [Fabbrini et al., 2010]. Age, family history, malnutrition, severe weight loss, gastrointestinal tract infection, certain medication, and some diseases (such as inflammatory bowel disease) are the other risk factors of NAFLD [Valenti et al., 2006; Ma et al., 2013; Lau et al., 2015]. In some studies, incidence of the disease has been

1  
2  
3 related to high intake of saturated fats or carbohydrates [Musso et al., 2003; Solga et al., 2004].  
4  
5 Some patients have normal weight although they may have abdominal obesity and insulin  
6  
7 resistance [Assy et al., 2008; Yasutake et al., 2009].  
8

9  
10 Nesfatin as a secreted neuropeptide by the hypothalamus in mammals is involved in regulating  
11  
12 appetite and body fat stores. Nesfatin gene is expressed in other locations such as brain,  
13  
14 pancreas, stomach endocrine cells, and adipocytes. Nesfatin gene expression is activated by  
15  
16 peroxisome proliferator-activated receptors (PPARs), especially PPAR $\gamma$ . Nesfatin plays an  
17  
18 important role in glucose metabolism, phosphorylation of certain signaling proteins, and  
19  
20 increasing insulin sensitivity in liver, particularly through AMPK (AMP-activated protein  
21  
22 kinase) [Oh et al, 2006; Basar et al, 2012]. In a recent study, the serum nesfatin level of  
23  
24 overweight/obese NAFLD patients (30-60 years) was found significantly lower than the healthy  
25  
26 group [Basar et al., 2012].

27  
28 The common treatment of NAFLD is lifestyle changing (gradual weight loss and increasing  
29  
30 physical activity) that can improve the liver enzymes, fat reposition, inflammation, and fibrosis  
31  
32 [Dixon et al., 2004; Luyckx et al., 1998; Palmer and Schaffner, 1990; Ueno et al., 1997; Shah et  
33  
34 al., 2009]. It seems that changes of dietary ingredients can be presented as a therapy method for  
35  
36 these patients [Zelber-Sagi et al., 2011] since losing weight and its maintenance for a long period  
37  
38 of time is hard [Katan, 2009]. Accordingly, the assessment of relationship between NAFLD and  
39  
40 certain nutrients or dietary ingredients is very important.

41  
42 Different studies have been conducted on curcumin roles in health. Curcumin as turmeric spice  
43  
44 (ginger family) in diet has multiple properties including antioxidant, anti-inflammatory,  
45  
46 antimicrobial, and anti-carcinogenic effects [Chauhan et al., 2014]. Due to the importance of  
47  
48 PPARs in metabolic pathways, numerous studies have been conducted to investigate the effects  
49  
50 of curcumin on PPARs especially PPAR $\gamma$  gene expression. It increases both the activity and  
51  
52 expression of PPAR $\gamma$  important in inhibiting inflammation and oxidative stress as the main  
53  
54 factors of insulin resistance and NAFLD [Pescosolido et al., 2014].

55  
56 The idea of this study is based on several properties of curcumin; it may modify the fatty liver  
57  
58 disease. Curcumin has several molecular targets that can play important roles in pathophysiology  
59  
60 and improvement of various diseases, especially NAFLD. Based on the relationship between  
progressive NAFLD and overweight/obesity and the efficacy of curcumin on blood profiles,

1  
2  
3 inflammation, liver function, serum nesfatin levels, and decreasing appetite in NAFLD patients,  
4 the proposed study is designed to evaluate the efficacy of curcumin in improving insulin  
5 resistance and other features of NAFLD, particularly via nesfatin. Despite multiple benefits of  
6 curcumin in health, its stability and bioavailability is very low, affecting its efficacy in therapy.  
7 Recently, many approaches are assessed to improve the stability and bioavailability of curcumin  
8 including the use of polymeric nanoparticles named nanocurcumin. For example, PLGA  
9 nanoparticles can increase the bioavailability of curcumin 22 times [Kamali et al., 2014]. In the  
10 proposed study, nanocurcumin will be used.  
11  
12  
13  
14  
15  
16  
17

## 18 **Methods**

### 19 *Study design*

20 A double-blind randomized clinical trial will be conducted.  
21  
22  
23

### 24 *Objectives*

- 25 1. Comparing the economic, occupational, marital status, and education levels of the subjects  
26 with nanocurcumin and placebo supplementation before the intervention  
27
- 28 1. Comparing the mean of serum triglyceride, LDL-cholesterol, total cholesterol, HDL-  
29 cholesterol, fasting blood sugar (FBS), insulin (FBI), hemoglobin-A1c, insulin resistance,  
30 sensitivity indices (HOMA-IR, QUICKI), TNF- $\alpha$ , IL-6, hs-CRP, and nesfatin within each  
31 group and between the two groups before and after the intervention  
32
- 33 2. Comparing the mean of weight, waist circumference, body mass index (BMI), body  
34 composition percentage, systolic and diastolic blood pressure within each group and between  
35 the two groups before and after the intervention  
36
- 37 3. Comparing the mean of physical activity score and intake of energy, macronutrients, and  
38 micronutrients within each group and between the two groups before and after the  
39 intervention  
40
- 41 4. Comparing the mean of age and height between the two groups before the intervention  
42  
43  
44  
45  
46  
47  
48  
49  
50  
51  
52

### 53 *Inclusion criteria*

- 54 1. Age: 25-50 years  
55  
56  
57  
58  
59  
60

- 1
  - 2
  - 3
  - 4
  - 5
  - 6
  - 7
  - 8
  - 9
  - 10
  - 11
  - 12
  - 13
  - 14
  - 15
  - 16
  - 17
  - 18
  - 19
  - 20
  - 21
  - 22
  - 23
  - 24
  - 25
  - 26
  - 27
  - 28
  - 29
  - 30
  - 31
  - 32
  - 33
  - 34
  - 35
  - 36
  - 37
  - 38
  - 39
  - 40
  - 41
  - 42
  - 43
  - 44
  - 45
  - 46
  - 47
  - 48
  - 49
  - 50
  - 51
  - 52
  - 53
  - 54
  - 55
  - 56
  - 57
  - 58
  - 59
  - 60
2. Overweight/obesity ( $25 \leq \text{BMI} < 35$ )
  3. Diagnosis of NAFLD by a radiologist based on the ultrasound test
  4. The informed consent

### *Exclusion criteria*

1. Alcohol consumption history during the last 12 months, based on person admission
2. Regular intake of nonsteroidal anti-inflammatory drugs, antibiotics, and corticosteroids during the last 6 months
3. Misuse of narcotics, psychotropic, and cigarettes over the last 6 months
4. Intake of anti-secretory drugs causing acholoridy, amiodarone, valproate, prednisone, tamoxifen, perhexiline, methotrexate, liver fat induced-drugs, hormone drugs, statins, antihypertensives, and ursodeoxycholic acid (UDCA) during the last 6 months
5. Intake of supplements such as probiotics, multivitamin-minerals, antioxidants, and omega-3 at least twice a week during the last 3 months
6. Diagnosis of pathological conditions affecting the liver such as viral hepatitis, acute or chronic liver failure, cholestasis, liver transplantation, acute systemic disease, cystic fibrosis disease, muscular dystrophy, previous surgery of gastrointestinal, neurological disorders, structural abnormalities of the gastrointestinal tract, diabetes, heart failure, thyroid disorders, kidney diseases, respiratory failure, psychological disorders, hereditary hemochromatosis, Wilson disease, alpha-1 antitrypsin deficiency, autoimmune diseases, celiac disease, and any malignancy
7. Rapid weight loss, total parenteral nutrition (TPN) history, and protein malnutrition over the last 6 months
8. Secondary causes of NAFLD such as drugs, surgical procedures, and environmental toxins
9. Conditions leading to the physical disability
10. Uncontrolled hypertension ( $>140/90$  mmHg)
11. Breastfeeding, pregnancy, and or plan for pregnancy in the next 3 months
12. Professional athlete or regular exercise
13. Intake of multivitamin-mineral or antioxidant supplements at least twice a week during the study
14. Taking no more than 10% of prescription supplements



## *Subjects*

Patients will be referred to a major executor, after diagnosis by a radiologist if meeting the eligibility criteria at the polyclinic of National Iranian Oil Company (NIOC) Central Hospital, Tehran, Iran. At the beginning, all study details will be clarified, and an informed consent form will be provided. Then, general, short-form IPAQ, and 24-hour food recall questionnaires will be fulfilled by interviewers. The necessary lifestyle changes including low-calorie diet (weight loss of 0.5-1 kg per a week during the trial according to BMI) and increase of the physical activity (aerobic, moderate intensity, at least three times a week about 30-45 min) will be prescribed. Anthropometrics including weight, height, and waist circumference will be measured by a digital scale, stadiometer, and non-elastic tape, respectively. Weight without shoes, minimum clothing, and with 100 gram accuracy, height in standing position without shoes with stocked heels to the wall, head and look frontwards and with 0.5 cm accuracy, and waist circumference in the middle of the last rib and the iliac crest, minimal clothing and with 0.5cm accuracy will be measured.

The 24-hour food recall questionnaire will be completed in the beginning, middle, and end of the study. The blood pressure will be measured after 10 min resting in a sitting position with a manometer (cuff in two-thirds of the upper right arm) at the beginning and the end of the study. At both the beginning and end of the intervention, 10 ml of blood will be taken from the brachial vein to measure the mentioned factors. Finally, these measurements will be presented to the patients privately.

## *The sample size*

According to Chuengsamarn et al. [2012], the mean  $\pm$  standard deviation of HOMA-IR index in the curcumin and the placebo groups were  $3.22 \pm 1.30$  and  $4.08 \pm 1.35$ , respectively. The sample size was calculated as 42 patients in each group with 95% confidence interval, 80% power, and 15% loss. A total of 84 patients will be invited and divided into two equal groups using block randomization method as follows:

1. 42 overweight/obese NAFLD patients with nanocurcumin supplement and advices of lifestyle change (weight loss diet and increasing physical activity) for 3 months intervention
2. 42 overweight/obese NAFLD patients with placebo supplement and advices of lifestyle change (weight loss diet and increasing physical activity) for 3 months intervention

### ***Intervention and randomization***

The block randomization method is used to divide patients into two equal groups. The age and gender distribution will be controlled using stratified randomization. In this study, the ratio of supplementation groups is 1:1. An assistant will perform the block randomization, and the intervention allotment will be blinded to the investigator and patients. The subjects will be randomly allocated into two groups taking nanocurcumin and placebo supplements. The supplements as A and B packages will be blinded to the investigators and participants.

No side effects and toxicity, taking 210 mg, have been reported for nanocurcumin [Kanai et al., 2012]. The supplementation dose will be 80 mg/day Sinacurcumin (according to company order, two 40mg capsules per day: 1 capsule with breakfast and one with dinner). Sinacurcumin and placebo supplements will be prepared by Exir-nanosina pharmaceutical company. The placebo supplement will contain polysorbate 80, soy oil, purified water, sorbitol 70, methyl paraben, and propyl paraben with nanocurcumin particles.

Stability and bioavailability of curcumin is very low. Curcumin is hardly dissolved in water, metabolized rapidly, and absorbed very weakly in intestine, and its plasma levels are very low. Human studies have shown that consuming 12 grams of curcumin daily is safe. Less than 1% of taken curcumin enters the bloodstream and is mostly metabolized in liver. Today, new ways are investigated to enhance the bioavailability of curcumin, especially through polymeric nanoparticles as nanocurcumin. Poly-Lactic-co-Glycolic Acid (PLGA) as a nanoparticle can increase the bioavailability of curcumin 22 times in mice [Kamali et al., 2014].

The supplements will be distributed monthly, and possible complications will be recorded (number of ingested capsules and given back packets). Also, the progress of study will be followed by calling once a week.

### ***Lifestyle changes***

The low-calorie diet according to the BMI for weight loss of 0.5-1 kg/week and increase of the physical activity as lifestyle changes will be presented by a qualified dietician present in the polyclinic of National Iranian Oil Company (NIOC) Central Hospital, Tehran, Iran.

### ***Assessments and measurements***

1  
2  
3 The ultrasound test will be done by a radiologist after than 12h fasting. The measurements of  
4 blood lipids (TC, HDL, LDL, TG) and liver enzymes (ALT, AST) will be determined by special  
5 kits and Hitachi analyzer (or BT-3500) device after 12h fasting. Blood sugar (FBS) will be  
6 determined by the glucose oxidase method. Fasting insulin (FBI) and glycated hemoglobin  
7 (HbA1c) will be measured by electrochemiluminescence ((ECL) by *co base e411*<sup>®</sup> analyzer  
8 device) and immunoturbidimetric method. Insulin resistance and sensitivity indices (HOMA,  
9 QUICKI) will be calculated according to the following formula:

$$16 \text{ QUICKI} = 1 / (\log (\text{FBI } \mu\text{U/mL}) + \log (\text{FBS mg/dL}))$$

$$17 \text{ HOMA1-IR} = (\text{FBI (mU/l)} \times \text{FBS (mmol/l)}) / 22.5$$

20  
21 The serum inflammatory markers (IL-6, TNF- $\alpha$ , hs-CRP) and nesfatin will be determined by the  
22 ELISA method (sandwich ELISA format) and specific kits. The ELISA test will be done by Elisa  
23 washer (Combiwash Human<sup>®</sup>) and bioElisa reader devices (biokit<sup>®</sup> EL x 800).

24  
25 The food intake status (at the beginning-middle-end) and physical activity (at the beginning and  
26 the end) will be investigated using the 24-hour food recall and the short-form IPAQ physical  
27 activity questionnaires. The dietary intakes will thus be examined and controlled. The body  
28 composition percentage including body fat and lean body mass will be determined by BIA (Bio-  
29 Impedance Analyzer) device (Tanita<sup>®</sup>).

30  
31 At the beginning and the end of the study, the systolic and diastolic blood pressure will be  
32 determined using a mercury manometer. The reported values are in mmHg. The waist  
33 circumference, weight, and height will be measured using non-elastic tape, digital scale, and  
34 stadiometer, respectively. Weight with minimal clothing, without shoes and with 100 grams  
35 accuracy, height in standing position, without shoes, heels sticking to the wall, with flat and  
36 forward head and 0.5 centimeters accuracy, and waist circumference at the middle of the last rib  
37 and the iliac crest with minimal clothing will be measured at the beginning and the end. The  
38 blood taking, storage of blood samples, and the lab tests will be conducted at National Iranian  
39 Oil Company (NIOC) Central Hospital, Tehran, Iran.

40  
41 The contents of enrolment, interventions, and assessments are presented in Figure 1.  
42 Furthermore, the SPIRIT checklist will be completed as an additional file. The progress of trial  
43 will be checked by an assistant regularly and independently.  
44  
45  
46  
47  
48  
49  
50  
51  
52

### ***Data analysis***

The data entry, coding, security, and saving will be checked. The data normality will be examined using a Kolmogorov-Smirnov test. Chi-square/nonparametric, Wilcoxon, T-test, ANCOVA, and Pearson correlation coefficient statistical tests will be applied. Confidence interval (CI) of 95% will be considered in all tests. The significance value is considered less than 0.05. The SPSS statistical software will be applied to analyze data.

### **Data accessibility**

The accessibility to the ultimate dataset is only limited to the major investigator. The results will be presented only via publication.

### **Discussion**

The proposed study is novel regarding to the evaluation of the efficacy of nanocurcumin on various parameters such as blood sugar, lipids, inflammatory markers, insulin resistance, and nesfatin among overweight/obese patients with non-alcoholic fatty liver disease (NAFLD) for the first time. It is very relevant because of various clinical uses and lack of studies related to the advantages or disadvantages of curcumin in NAFLD patients. However, the clinical practice of curcumin for the treatment of some disorders needs to be investigated, taking into account the possible prospective of it in several diseases, especially NAFLD. Due to increasing the values of obesity and following NAFLD, significant alteration of some blood factors in these patients and few studies on efficacy of nano-curcumin, the proposed study has aimed to select these groups of patients as the most pertinent participants for intervention.

The strength points of the trial are: randomized double blinded design, protocol publication, determining dietary and physical activity status, and registering patient-reported possible problems.

The trial limitations are slow recruiting of patients due to the criteria, selecting a single policlinic, and lack of cooperation of some participants to complete the intervention.

### **Trial Status**

The patient employment will continue at the time of protocol submission.

## Abbreviations

NAFLD: non-alcoholic fatty liver disease, BMI: body mass index, NF- $\kappa$ B: nuclear factor kappa-light-chain-enhancer of activated B cells, TNF- $\alpha$ : tumor necrosis factor-alpha, PPAR: peroxisome proliferation activated receptor, HOMA-IR: homeostasis model assessment-insulin resistance, QUICKI: quantitative insulin sensitivity check index, IL-6: interleukin-6, hs-CRP: high-sensitivity C-reactive protein, TPN: total parenteral nutrition, CNS: central nervous system, IPAQ: international physical activity questionnaire, TC: total cholesterol, HDL-C: high density lipoprotein-cholesterol, LDL-C: low density lipoprotein-cholesterol, ALT: alanine transaminase, AST: aspartate transaminase, FBS: fasting blood sugar, FBI: fasting blood insulin, ELISA: enzyme-linked immunosorbent assay, ANCOVA: analysis of covariance

## Declaration

### *Ethical Approval and Consent to participate*

The ethical approval of this trial was conducted by the ethics committee of Tehran University of Medical Sciences (Ethical Code: IR.TUMS.REC.1395.2612). All participants will complete an informed consent form (in Farsi). Participation and continuing supplementation is free and voluntary for patients. In the trial, advises of lifestyle modification will be presented free to patients. The health care services of the hospital will be provided without inconsistency. Side effects of supplements have not been published previously. The personal information of patients will be kept confidential.

### *Consent for publication*

Not applicable

### *Availability of supporting data*

Not applicable

### *Competing interests*

There is no potential conflict of interests with respect to the research, authorship, and publication.

### ***Funding***

The trial funding is supported by Tehran University of Medical Sciences.

### ***Authors' contributions***

SAJT, MJHA, and SMR conceived and developed the idea for the study, and revised the manuscript. SM, SMA, and MDM contributed to data collection. MDM wrote numerous drafts of the study. MQ contributed to statistical interpretations. All authors read and approved the final manuscript.

### ***Consent to publish***

Not applicable

### ***Acknowledgement***

Supports of Tehran University of Medical Sciences and Cooperation of National Iranian Oil Company (NIOC) Central Hospital, Tehran, Iran are acknowledged.

### ***Authors information***

Ali Jazayeri-Tehrani: Email: [ajazayeri@farabi.tums.ac.ir](mailto:ajazayeri@farabi.tums.ac.ir), Phone: +989128134260

Mehdi Rezayat: Email: [rezayat@tums.ac.ir](mailto:rezayat@tums.ac.ir), Phone: +989124708873

Siavash Mansouri: Email: [siavash.mansouri@gmail.com](mailto:siavash.mansouri@gmail.com), Phone: +989121206999

Mostafa Qorbani: Email: [mqorbani1379@yahoo.com](mailto:mqorbani1379@yahoo.com), Phone: +989125855021

Seyed Moayed Alavian: Email: [alavian@thc.ir](mailto:alavian@thc.ir), Phone: +989121073195

Milad Daneshi-Maskooni: Email: [mi-daneshi@razi.tums.ac.ir](mailto:mi-daneshi@razi.tums.ac.ir), Phone: +989190026295

Mohammad-Javad Hosseinzadeh-Attar: Email: [mhosseinzadeh@tums.ac.ir](mailto:mhosseinzadeh@tums.ac.ir), Phone: 09123717305

### **References**

1. Abdallah Ismail N, Ragab S, Abd El Baky ANE, Hamed M, Ahmed Ibrahim AS. Effect of Oral Curcumin Administration on Insulin Resistance, Serum Resistin and Fetuin-A in Obese Children: Randomized Placebo-Controlled Study. *Research Journal of Pharmaceutical, Biological and Chemical Sciences* 2014; 5(1): 887-896.
2. Adibi A, Jaberzadeh-Ansari M, Dalili AR, Omidifar N, Sadeghi M. Association between Nonalcoholic Fatty Liver Disease (NAFLD) and Coronary Artery Disease (CAD) in Patients with Angina Pectoris. *Open Journal of Medical Imaging* 2013; 3: 97-101. <http://dx.doi.org/10.4236/ojmi.2013.33015>.
3. Amirkalali B, POUSTCHI H, KEYVANI H, KHANSARI MR, AJDARKOSH H, MAADI M, et al. Prevalence of Non-Alcoholic Fatty Liver Disease and Its Predictors in North of Iran. *Iranian J Publ Health* 2014; 43(9): 1275-1283.



4. Anand P, Sundaram C, Jhurani S, Kunnumakkara AB, Aggarwal BB. Curcumin and cancer: an "old-age" disease with an "age-old" solution. *Cancer Lett* 2008; 267(1): 133-64.
5. Angulo P. Nonalcoholic fatty liver disease. *N Engl. J. Med.* 2002; 346(16): 1221-31.
6. Assy N, Nasser G, Kamayse I, Nseir W, Beniashvili Z, Djibre A, Grosovski M. Soft drink consumption linked with fatty liver in the absence of traditional risk factors. *Can J Gastroenterol.* 2008; 22: 811-816.
7. Bagheri Lankarani K, Ghaffarpasand F, Mahmoodi M, Lotfi M, Zamiri N, Heydari ST, et al. Non Alcoholic Fatty Liver Disease in Southern Iran: A Population Based Study. *Hepat Mon.* 2013; 13(5): e9248.
8. Chuengsamarn S, Rattanamongkolgul S, Luechapudiporn R, Phisalaphong C, Jirawatnotai S. Curcumin Extract for Prevention of Type 2 Diabetes. *Diabetes Care* 35:2121–2127, 2012.
9. Dixon JB, Bhathal PS, Hughes NR, O'Brien PE. Nonalcoholic fatty liver disease: Improvement in liver histological analysis with weight loss. *Hepatology.* 2004; 39: 1647-1654
10. Dowman JK, Tomlinson JW, Newsome PN. Systematic review: the diagnosis and staging of non-alcoholic fatty liver disease and non-alcoholic steatohepatitis. *Aliment Pharmacol Ther* 2011; 33: 525–540.
11. Eslamparast T, Eghtesad S, Poustchi H, Hekmatdoost A. Recent advances in dietary supplementation, in treating non-alcoholic fatty liver disease. *World J Hepatol* 2015 February 27; 7(2): 204-212. DOI: 10.4254/wjh.v7.i2.204
12. Fabbrini E, Sullivan Sh, Klein S. Obesity and Nonalcoholic Fatty Liver Disease: Biochemical, Metabolic and Clinical Implications. *Hepatology.* 2010 February; 51(2): 679–689. doi:10.1002/hep.23280.
13. Ganjali S, Sahebkar A, Mahdipour E, Jamialahmadi K, Torabi S, Akhlaghi S, et al. Investigation of the Effects of Curcumin on Serum Cytokines in Obese Individuals: A Randomized Controlled Trial. *The Scientific World Journal* 2014; Article ID: 898361, 6 pages. <http://dx.doi.org/10.1155/2014/898361>.
14. Hamaguchi M, Kojima T, Takeda N, Nakagawa T, Taniguchi H, Fujii K, and et al. The metabolic syndrome as a predictor of nonalcoholic fatty liver disease. *Ann. Intern. Med.* 2005; 143(10): 722-8.
15. Jacob A, Wu R, Zhou M, Wang P. Mechanism of the Anti-inflammatory Effect of Curcumin: PPAR- $\gamma$  Activation. *PPAR Research* 2007; Article ID: 89369. 5 pages. doi:10.1155/2007/89369.
16. Kamali E, Ghaedi K, Karimi P, Kheradmand P, Tavassoli M. Biological and Anticancer Effects of Curcumin. *J Isfahan Med Sch* 2014; 31(265): 2097-112.
17. Kanai M, Imaizumi A, Otsuka Y, Sasaki H, Hashiguchi M, Tsujiko K, et al. Dose-escalation and pharmacokinetic study of nanoparticle curcumin, a potential anticancer agent with improved bioavailability, in healthy human volunteers. *Cancer Chemother Pharmacol* 2012; 69: 65–70. DOI: 10.1007/s00280-011-1673-1.
18. Karimi-Sari H, Mousavi-Naeini SM, Ramezani-Binabaj M, Najafzadeh-Sari S, Mir-Jalili AH, Dolatimehr F. Prevalence of Non-Alcoholic Fatty Liver Disease in Morbidly Obese Patients Undergoing Sleeve Bariatric Surgery in Iran and Association With Other Comorbid Conditions. *Jundishapur J Chronic Dis Care.* 2015 April; 4(2): e25128. DOI: 10.5812/jjcdc.25128.
19. Katan MB. Weight-loss diets for the prevention and treatment of obesity. *N Engl J Med,* 2009. 360: 923-925.
20. Lau E, Carvalho D, Freitas P. Gut Microbiota: Association with NAFLD and Metabolic Disturbances. *BioMed Research International* 2015. Article ID 979515.
21. Liu ZJ, Liu W, Liu L, Xiao Ch, Wang Y, Jiao JS. Curcumin Protects Neuron against Cerebral Ischemia-Induced Inflammation through Improving PPAR-Gamma Function. *Evidence-Based Complementary and Alternative Medicine* 2013; Article ID: 470975: 1-10.
22. Luyckx FH, Desai C, Thiry A, Dewe W, Scheen AJ, Gielen JE, Lefebvre PJ. Liver abnormalities in severely obese subjects: effect of drastic weight loss after gastroplasty. *Int J Obes Relat Metab Disord.* 1998; 22: 222-226.

23. Ma YY, Li L, Yu CH, Shen Z, Chen LH, Li YM. Effects of probiotics on nonalcoholic fatty liver disease: A meta-analysis. *World J Gastroenterol* 2013 October 28; 19(40): 6911-6918. doi:10.3748/wjg.v19.i40.6911.
24. Musso G, Gambino R, De Michieli F, Cassader M, Rizzetto M, Durazzo M, and et al. Dietary habits and their relations to insulin resistance and postprandial lipemia in nonalcoholic steatohepatitis. *Hepatology*. 2003; 37: 909-916.
25. Nishioji K, Sumida Y, Kamaguchi M, Mochizuki N, Kobayashi M, Nishimura T, et al. Prevalence of and risk factors for non-alcoholic fatty liver disease in a non-obese Japanese population, 2011–2012. *J Gastroenterol* (2015); 50: 95–108. DOI 10.1007/s00535-014-0948-9.
26. Oh IS, Shimizu H, Satoh T, Okada S, Adachi S, Inoue K, Eguchi H, Yamamoto M, Imaki T, Hashimoto K et al. 2006 Identification of nesfatin-1 as a satiety molecule in the hypothalamus. *Nature* 443 709–712. (doi:10.1038/nature05162).
27. Palmer M, Schaffner F. Effect of weight reduction on hepatic abnormalities in overweight patients. *Gastroenterology*. 1990; 99: 1408-1413.
28. Panahi Y, Sahebkar A, Parvin S, Saadat A. A randomized controlled trial on the anti-inflammatory effects of curcumin in patients with chronic sulphur mustard-induced cutaneous complications. *Ann Clin Biochem* 2012; 49: 580–588. DOI: 10.1258 /acb.2012.012040.
29. Roghani Dehkordi F, Roghani M, Baluchnejadmojarad T. The effect of curcumin on serum level of aspartate and alanine aminotransferase and cardiac level of oxidative stress markers in diabetic rats. *Pejouhandeh* 2012;17(1):18-25.
30. Sahebkar AH. Potential efficacy of ginger as a natural supplement for nonalcoholic fatty liver disease. *World J Gastroenterol* 2011 January 14; 17(2): 271-272. doi:10.3748/wjg.v17.i2.271.
31. Sass DA, Chang P, Chopra KB. Nonalcoholic Fatty Liver Disease: A Clinical Review. *Digestive Diseases and Sciences* 2005; 50(1): 171–180. DOI:10.1007/s10620-005-1267-z.
32. Shah K, Stufflebam A, Hilton TN, Sinacore DR, Klein S, Villareal DT. Diet and exercise interventions reduce intrahepatic fat content and improve insulin sensitivity in obese older adults. *Obesity*. 2009; 17: 2162-2168.
33. Shehzad A, Ha T, Subhan F, Lee YS. New mechanisms and the anti-inflammatory role of curcumin in obesity and obesity-related metabolic diseases. *Eur J Nutr* (2011) 50:151–161. DOI: 10.1007/s00394-011-0188-1.
34. Sherlock S, and Dooley J. *Diseases of the Liver and Biliary System*. 11th ed. Oxford: Blackwell Science.2002: 423.
35. Solga S, AlkhrAIShe AR, Clark JM, Torbenson M, Greenwald A, Diehl AM, and et al. Dietary composition and nonalcoholic fatty liver disease. *Dig Dis Sci*. 2004. 49: 1578-1583.
36. Ueno T, Sugawara H, Sujaku K, Hashimoto O, Tsuji R, Tamaki S, and et al. Therapeutic effects of restricted diet and exercise in obese patients with fatty liver. *J Hepatol*. 1997; 27: 103-107.
37. Um MY, Hwang KH, Ahn J, Ha TY. Curcumin Attenuates Diet-Induced Hepatic Steatosis by Activating AMP-Activated Protein Kinase. *Basic & Clinical Pharmacology & Toxicology*, 2013, 113, 152–157. Doi: 10.1111/bcpt.12076.
38. Valenti L, Dongiovanni P, Piperno A, Fracanzani AL, Maggioni M, Rametta R, and et al. Alpha 1-antitrypsin mutations in NAFLD: high prevalence and association with altered iron metabolism but not with liver damage. *Hepatology*. 2006; 44(4): 857-64.
39. Wei Y, Rector RS, Thyfault JP, Ibdah JA. Nonalcoholic fatty liver disease and mitochondrial dysfunction. *World J Gastroenterol* 2008; 14(2): 193-199. <http://dx.doi.org/10.3748/wjg.14.193>.
40. Yasutake K, Nakamuta M, Shima Y, Ohyama A, Masuda K, Haruta N, and et al. Nutritional investigation of non-obese patients with non-alcoholic fatty liver disease: the significance of dietary cholesterol. *Scand J Gastroenterol*. 2009; 44: 471-477.
41. Zelber-Sagi S, Ratziu V, Oren R. Nutrition and physical activity in NAFLD: An overview of the epidemiological evidence. *World J Gastroenterol*. 2011; 17(29): 3377-3389.



**Figure**

The overall contents related to enrollment, interventions, and assessments are presented in Figure 1.

**Figure 1:** Content of enrollment, interventions, and assessments

| Trial contents           | STUDY PERIOD    |            |                 |              |            |            |
|--------------------------|-----------------|------------|-----------------|--------------|------------|------------|
|                          | Enrolment       | Allocation | Post-allocation |              |            | Close-out  |
| TIMEPOINT                | -t <sub>1</sub> | 0          | +1 Month        | +1.5 Monthes | +2 Monthes | +3 Monthes |
| <b>ENROLMENT:</b>        | X               |            |                 |              |            |            |
| Eligibility screen       | X               |            |                 |              |            |            |
| Informed consent         | X               | X          |                 |              |            |            |
| General questionnaire    |                 | X          |                 |              |            |            |
| 24hour food recall       |                 | X          |                 | X            |            | X          |
| SF-IPAQ questionnaire    |                 | X          |                 |              |            | X          |
| Anthropometrics          |                 | X          |                 |              |            | X          |
| Other questionnaires     |                 | X          |                 |              |            | X          |
| Blood taking             |                 | X          |                 |              |            | X          |
| Allocation               |                 | X          |                 |              |            |            |
| <b>INTERVENTIONS:</b>    |                 |            |                 |              |            |            |
| [Intervention A]         |                 | X          | X               |              | X          |            |
| [Intervention B]         |                 | X          | X               |              | X          |            |
| <b>ASSESSMENTS:</b>      |                 |            |                 |              |            |            |
| Dietary status           |                 | X          |                 | X            |            | X          |
| Blood pressure           |                 | X          |                 |              |            | X          |
| Inflammatory factors     |                 | X          |                 |              |            | X          |
| Lipid profile            |                 | X          |                 |              |            | X          |
| Blood sugar indices      |                 | X          |                 |              |            | X          |
| Nesfatin                 |                 | X          |                 |              |            | X          |
| Physical activity status |                 | X          |                 |              |            | X          |
| Anthropometrics          |                 | X          |                 |              |            | X          |
| Socioeconomic status     |                 | X          |                 |              |            |            |

**Additional file 1**

SPIRIP Checklist.doc; this checklist applies to protocols for all clinical trials and focuses on content rather than format. The checklist recommends a full description of what is planned; it does not prescribe how to design or conduct a trial. The SPIRIT recommendations aim to facilitate the drafting of high-quality protocols and enhance the transparency and completeness of trial protocols for the benefit of investigators, trial participants, patients, sponsors, funders, research ethics committees or institutional review boards, peer reviewers, journals, trial registries, policymakers, regulators, and other key stakeholders.

Click here for file:

[[www.spirit-statement.org/wp-content/uploads/2013/08/SPIRIT-Checklist-download-8Jan13.doc](http://www.spirit-statement.org/wp-content/uploads/2013/08/SPIRIT-Checklist-download-8Jan13.doc)]

1  
2  
3  
4 **Cover Letter**

5  
6 Dear editor,

7  
8 Following is our manuscript entitled “**The efficacy of nanocurcumin supplementation on insulin**  
9 **resistance, lipids, inflammatory factors and nesfatin among overweight/obese patients with non-**  
10 **alcoholic fatty liver disease (NAFLD): A Trial Protocol**” for consideration for publication by the “*BMJ*  
11 *Open*”. The authors would like to advise that all authors listed have contributed to the work and approved  
12 the content of the submitted manuscript. There is no conflict of interest to declare. All authors have  
13 agreed to submit the manuscript to the “*BMJ Open*”. No part of the work has been published before. We  
14 believe that our protocol could be of interest to the readers of “*BMJ Open*”. The corresponding author  
15 will correspond with the journal. SAJT, MJHA, and SMR conceived and developed the idea for the study  
16 and revised the manuscript; SM, SMA, and MDM contributed to data collection. MDM wrote numerous  
17 drafts. MQ contributed to statistical interpretations.  
18  
19  
20  
21  
22  
23

24  
25 **Regards,**

26  
27 **Dr.Mohammad-Javad Hosseinzadeh-Attar (corresponding author),**

28 MD, PhD, Professor,

29 Department of Clinical Nutrition,

30 School of Nutritional Sciences and Dietetics,

31 Tehran University of Medical Sciences,

32 No.44, Hojjatdoust Alley, Naderi St, Keshavarz Blvd, Tehran, Iran.

33 Email: [mhosseinzadeh@tums.ac.ir](mailto:mhosseinzadeh@tums.ac.ir)

34 Phone: +98-21-88955569, Telefax: +98-21-88974462  
35  
36  
37  
38  
39  
40  
41  
42  
43  
44  
45  
46  
47  
48  
49  
50  
51  
52  
53  
54  
55  
56  
57  
58  
59  
60

**Figure 1.** Content of enrolment, interventions, and assessments.

| Trial Contents           | STUDY PERIOD    |            |                 |              |            |            |
|--------------------------|-----------------|------------|-----------------|--------------|------------|------------|
|                          | Enrolment       | Allocation | Post-allocation |              |            | Close-out  |
| TIMEPOINT                | -t <sub>1</sub> | 0          | +1 Month        | +1.5 Monthes | +2 Monthes | +3 Monthes |
| <b>ENROLMENT:</b>        | X               |            |                 |              |            |            |
| Eligibility screen       | X               |            |                 |              |            |            |
| Informed consent         | X               | X          |                 |              |            |            |
| General questionnaire    |                 | X          |                 |              |            |            |
| 24hour food recall       |                 | X          |                 | X            |            | X          |
| SF-IPAQ questionnaire    |                 | X          |                 |              |            | X          |
| Anthropometrics          |                 | X          |                 |              |            | X          |
| Other questionnaires     |                 | X          |                 |              |            | X          |
| Blood taking             |                 | X          |                 |              |            | X          |
| Allocation               |                 | X          |                 |              |            |            |
| <b>INTERVENTIONS:</b>    |                 |            |                 |              |            |            |
| [Intervention A]         |                 | X          | X               |              | X          |            |
| [Intervention B]         |                 | X          | X               |              | X          |            |
| <b>ASSESSMENTS:</b>      |                 |            |                 |              |            |            |
| Dietary status           |                 | X          |                 | X            |            | X          |
| Blood pressure           |                 | X          |                 |              |            | X          |
| Inflammatory factors     |                 | X          |                 |              |            | X          |
| Lipid profile            |                 | X          |                 |              |            | X          |
| Blood sugar indices      |                 | X          |                 |              |            | X          |
| Nesfatin                 |                 | X          |                 |              |            | X          |
| Physical activity status |                 | X          |                 |              |            | X          |
| Anthropometrics          |                 | X          |                 |              |            | X          |
| Socioeconomic status     |                 | X          |                 |              |            |            |

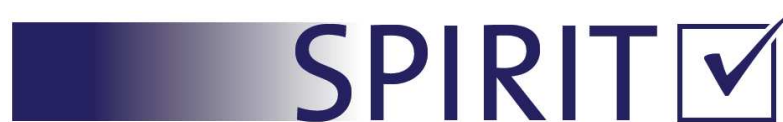

STANDARD PROTOCOL ITEMS: RECOMMENDATIONS FOR INTERVENTIONAL TRIALS

SPIRIT 2013 Checklist: Recommended items to address in a clinical trial protocol and related documents\*

| Section/item                      | Item No | Description                                                                                                                                                                                                                                                                              | Addressed on page number |
|-----------------------------------|---------|------------------------------------------------------------------------------------------------------------------------------------------------------------------------------------------------------------------------------------------------------------------------------------------|--------------------------|
| <b>Administrative information</b> |         |                                                                                                                                                                                                                                                                                          |                          |
| Title                             | 1       | Descriptive title identifying the study design, population, interventions, and, if applicable, trial acronym                                                                                                                                                                             | 1                        |
| Trial registration                | 2a      | Trial identifier and registry name. If not yet registered, name of intended registry                                                                                                                                                                                                     | 2                        |
|                                   | 2b      | All items from the World Health Organization Trial Registration Data Set                                                                                                                                                                                                                 | -                        |
| Protocol version                  | 3       | Date and version identifier                                                                                                                                                                                                                                                              | 2                        |
| Funding                           | 4       | Sources and types of financial, material, and other support                                                                                                                                                                                                                              | 14                       |
| Roles and responsibilities        | 5a      | Names, affiliations, and roles of protocol contributors                                                                                                                                                                                                                                  | 1, 14                    |
|                                   | 5b      | Name and contact information for the trial sponsor                                                                                                                                                                                                                                       | -                        |
|                                   | 5c      | Role of study sponsor and funders, if any, in study design; collection, management, analysis, and interpretation of data; writing of the report; and the decision to submit the report for publication, including whether they will have ultimate authority over any of these activities | 14                       |
|                                   | 5d      | Composition, roles, and responsibilities of the coordinating centre, steering committee, endpoint adjudication committee, data management team, and other individuals or groups overseeing the trial, if applicable (see Item 21a for data monitoring committee)                         | -                        |
| <b>Introduction</b>               |         |                                                                                                                                                                                                                                                                                          |                          |
| Background and rationale          | 6a      | Description of research question and justification for undertaking the trial, including summary of relevant studies (published and unpublished) examining benefits and harms for each intervention                                                                                       | 3, 4, 5                  |
|                                   | 6b      | Explanation for choice of comparators                                                                                                                                                                                                                                                    | -                        |
| Objectives                        | 7       | Specific objectives or hypotheses                                                                                                                                                                                                                                                        | 6                        |

|                                                                     |     |                                                                                                                                                                                                                                                                                                                                                                                |             |
|---------------------------------------------------------------------|-----|--------------------------------------------------------------------------------------------------------------------------------------------------------------------------------------------------------------------------------------------------------------------------------------------------------------------------------------------------------------------------------|-------------|
| Trial design                                                        | 8   | Description of trial design including type of trial (eg, parallel group, crossover, factorial, single group), allocation ratio, and framework (eg, superiority, equivalence, non-inferiority, exploratory)                                                                                                                                                                     | 2, 6, 9, 10 |
| <b>Methods: Participants, interventions, and outcomes</b>           |     |                                                                                                                                                                                                                                                                                                                                                                                |             |
| Study setting                                                       | 9   | Description of study settings (eg, community clinic, academic hospital) and list of countries where data will be collected. Reference to where list of study sites can be obtained                                                                                                                                                                                             | 8, 11       |
| Eligibility criteria                                                | 10  | Inclusion and exclusion criteria for participants. If applicable, eligibility criteria for study centres and individuals who will perform the interventions (eg, surgeons, psychotherapists)                                                                                                                                                                                   | 7           |
| Interventions                                                       | 11a | Interventions for each group with sufficient detail to allow replication, including how and when they will be administered                                                                                                                                                                                                                                                     | 9, 10       |
|                                                                     | 11b | Criteria for discontinuing or modifying allocated interventions for a given trial participant (eg, drug dose change in response to harms, participant request, or improving/worsening disease)                                                                                                                                                                                 | 11          |
|                                                                     | 11c | Strategies to improve adherence to intervention protocols, and any procedures for monitoring adherence (eg, drug tablet return, laboratory tests)                                                                                                                                                                                                                              | 11          |
|                                                                     | 11d | Relevant concomitant care and interventions that are permitted or prohibited during the trial                                                                                                                                                                                                                                                                                  | 9, 10, 11   |
| Outcomes                                                            | 12  | Primary, secondary, and other outcomes, including the specific measurement variable (eg, systolic blood pressure), analysis metric (eg, change from baseline, final value, time to event), method of aggregation (eg, median, proportion), and time point for each outcome. Explanation of the clinical relevance of chosen efficacy and harm outcomes is strongly recommended | 11          |
| Participant timeline                                                | 13  | Time schedule of enrolment, interventions (including any run-ins and washouts), assessments, and visits for participants. A schematic diagram is highly recommended (see Figure)                                                                                                                                                                                               | 10, 11      |
| Sample size                                                         | 14  | Estimated number of participants needed to achieve study objectives and how it was determined, including clinical and statistical assumptions supporting any sample size calculations                                                                                                                                                                                          | 9           |
| Recruitment                                                         | 15  | Strategies for achieving adequate participant enrolment to reach target sample size                                                                                                                                                                                                                                                                                            | 9           |
| <b>Methods: Assignment of interventions (for controlled trials)</b> |     |                                                                                                                                                                                                                                                                                                                                                                                |             |
| Allocation:                                                         |     |                                                                                                                                                                                                                                                                                                                                                                                |             |
| Sequence generation                                                 | 16a | Method of generating the allocation sequence (eg, computer-generated random numbers), and list of any factors for stratification. To reduce predictability of a random sequence, details of any planned restriction (eg, blocking) should be provided in a separate document that is unavailable to those who enrol participants or assign interventions                       | 10          |

|                                                           |     |                                                                                                                                                                                                                                                                                                                                                                                                              |           |
|-----------------------------------------------------------|-----|--------------------------------------------------------------------------------------------------------------------------------------------------------------------------------------------------------------------------------------------------------------------------------------------------------------------------------------------------------------------------------------------------------------|-----------|
| Allocation concealment mechanism                          | 16b | Mechanism of implementing the allocation sequence (eg, central telephone; sequentially numbered, opaque, sealed envelopes), describing any steps to conceal the sequence until interventions are assigned                                                                                                                                                                                                    | 11        |
| Implementation                                            | 16c | Who will generate the allocation sequence, who will enrol participants, and who will assign participants to interventions                                                                                                                                                                                                                                                                                    | 9, 10, 11 |
| Blinding (masking)                                        | 17a | Who will be blinded after assignment to interventions (eg, trial participants, care providers, outcome assessors, data analysts), and how                                                                                                                                                                                                                                                                    | 10        |
|                                                           | 17b | If blinded, circumstances under which unblinding is permissible, and procedure for revealing a participant's allocated intervention during the trial                                                                                                                                                                                                                                                         | 10        |
| <b>Methods: Data collection, management, and analysis</b> |     |                                                                                                                                                                                                                                                                                                                                                                                                              |           |
| Data collection methods                                   | 18a | Plans for assessment and collection of outcome, baseline, and other trial data, including any related processes to promote data quality (eg, duplicate measurements, training of assessors) and a description of study instruments (eg, questionnaires, laboratory tests) along with their reliability and validity, if known. Reference to where data collection forms can be found, if not in the protocol | 11        |
|                                                           | 18b | Plans to promote participant retention and complete follow-up, including list of any outcome data to be collected for participants who discontinue or deviate from intervention protocols                                                                                                                                                                                                                    | 9         |
| Data management                                           | 19  | Plans for data entry, coding, security, and storage, including any related processes to promote data quality (eg, double data entry; range checks for data values). Reference to where details of data management procedures can be found, if not in the protocol                                                                                                                                            | 12        |
| Statistical methods                                       | 20a | Statistical methods for analysing primary and secondary outcomes. Reference to where other details of the statistical analysis plan can be found, if not in the protocol                                                                                                                                                                                                                                     | 12        |
|                                                           | 20b | Methods for any additional analyses (eg, subgroup and adjusted analyses)                                                                                                                                                                                                                                                                                                                                     | 12        |
|                                                           | 20c | Definition of analysis population relating to protocol non-adherence (eg, as randomised analysis), and any statistical methods to handle missing data (eg, multiple imputation)                                                                                                                                                                                                                              | -         |
| <b>Methods: Monitoring</b>                                |     |                                                                                                                                                                                                                                                                                                                                                                                                              |           |
| Data monitoring                                           | 21a | Composition of data monitoring committee (DMC); summary of its role and reporting structure; statement of whether it is independent from the sponsor and competing interests; and reference to where further details about its charter can be found, if not in the protocol. Alternatively, an explanation of why a DMC is not needed                                                                        | 14        |
|                                                           | 21b | Description of any interim analyses and stopping guidelines, including who will have access to these interim results and make the final decision to terminate the trial                                                                                                                                                                                                                                      | -         |

|                                 |     |                                                                                                                                                                                                                                                                                     |        |
|---------------------------------|-----|-------------------------------------------------------------------------------------------------------------------------------------------------------------------------------------------------------------------------------------------------------------------------------------|--------|
| Harms                           | 22  | Plans for collecting, assessing, reporting, and managing solicited and spontaneously reported adverse events and other unintended effects of trial interventions or trial conduct                                                                                                   | 11     |
| Auditing                        | 23  | Frequency and procedures for auditing trial conduct, if any, and whether the process will be independent from investigators and the sponsor                                                                                                                                         | 12     |
| <b>Ethics and dissemination</b> |     |                                                                                                                                                                                                                                                                                     |        |
| Research ethics approval        | 24  | Plans for seeking research ethics committee/institutional review board (REC/IRB) approval                                                                                                                                                                                           | 13, 14 |
| Protocol amendments             | 25  | Plans for communicating important protocol modifications (eg, changes to eligibility criteria, outcomes, analyses) to relevant parties (eg, investigators, REC/IRBs, trial participants, trial registries, journals, regulators)                                                    | -      |
| Consent or assent               | 26a | Who will obtain informed consent or assent from potential trial participants or authorised surrogates, and how (see Item 32)                                                                                                                                                        | 7, 9   |
|                                 | 26b | Additional consent provisions for collection and use of participant data and biological specimens in ancillary studies, if applicable                                                                                                                                               | -      |
| Confidentiality                 | 27  | How personal information about potential and enrolled participants will be collected, shared, and maintained in order to protect confidentiality before, during, and after the trial                                                                                                | 14     |
| Declaration of interests        | 28  | Financial and other competing interests for principal investigators for the overall trial and each study site                                                                                                                                                                       | 14     |
| Access to data                  | 29  | Statement of who will have access to the final trial dataset, and disclosure of contractual agreements that limit such access for investigators                                                                                                                                     | 12     |
| Ancillary and post-trial care   | 30  | Provisions, if any, for ancillary and post-trial care, and for compensation to those who suffer harm from trial participation                                                                                                                                                       | -      |
| Dissemination policy            | 31a | Plans for investigators and sponsor to communicate trial results to participants, healthcare professionals, the public, and other relevant groups (eg, via publication, reporting in results databases, or other data sharing arrangements), including any publication restrictions | 12     |
|                                 | 31b | Authorship eligibility guidelines and any intended use of professional writers                                                                                                                                                                                                      | -      |
|                                 | 31c | Plans, if any, for granting public access to the full protocol, participant-level dataset, and statistical code                                                                                                                                                                     | -      |
| <b>Appendices</b>               |     |                                                                                                                                                                                                                                                                                     |        |

1  
2  
3  
4  
5  
6  
7  
8  
9  
10  
11  
12  
13  
14  
15  
16  
17  
18  
19  
20  
21  
22  
23  
24  
25  
26  
27  
28  
29  
30  
31  
32  
33  
34  
35  
36  
37  
38  
39  
40  
41  
42  
43  
44  
45  
46  
47  
48  
49

|                            |    |                                                                                                                                                                                                |              |
|----------------------------|----|------------------------------------------------------------------------------------------------------------------------------------------------------------------------------------------------|--------------|
| Informed consent materials | 32 | Model consent form and other related documentation given to participants and authorised surrogates                                                                                             | - (In Farsi) |
| Biological specimens       | 33 | Plans for collection, laboratory evaluation, and storage of biological specimens for genetic or molecular analysis in the current trial and for future use in ancillary studies, if applicable | 12           |

\*It is strongly recommended that this checklist be read in conjunction with the SPIRIT 2013 Explanation & Elaboration for important clarification on the items. Amendments to the protocol should be tracked and dated. The SPIRIT checklist is copyrighted by the SPIRIT Group under the Creative Commons "[Attribution-NonCommercial-NoDerivs 3.0 Unported](#)" license.

For peer review only



# BMJ Open

## The Efficacy of Nanocurcumin Supplementation on Insulin Resistance, Lipids, Inflammatory Factors, and Nesfatin among Obese Patients with Non-Alcoholic Fatty Liver Disease (NAFLD): A Trial Protocol



|                                 |                                                                                                                                                                                                                                                                                                                                                                                                                                                                                                                                                                                                                                                                                                                                                                                                                                                                                                                                                         |
|---------------------------------|---------------------------------------------------------------------------------------------------------------------------------------------------------------------------------------------------------------------------------------------------------------------------------------------------------------------------------------------------------------------------------------------------------------------------------------------------------------------------------------------------------------------------------------------------------------------------------------------------------------------------------------------------------------------------------------------------------------------------------------------------------------------------------------------------------------------------------------------------------------------------------------------------------------------------------------------------------|
| Journal:                        | <i>BMJ Open</i>                                                                                                                                                                                                                                                                                                                                                                                                                                                                                                                                                                                                                                                                                                                                                                                                                                                                                                                                         |
| Manuscript ID                   | bmjopen-2017-016914.R1                                                                                                                                                                                                                                                                                                                                                                                                                                                                                                                                                                                                                                                                                                                                                                                                                                                                                                                                  |
| Article Type:                   | Protocol                                                                                                                                                                                                                                                                                                                                                                                                                                                                                                                                                                                                                                                                                                                                                                                                                                                                                                                                                |
| Date Submitted by the Author:   | 24-May-2017                                                                                                                                                                                                                                                                                                                                                                                                                                                                                                                                                                                                                                                                                                                                                                                                                                                                                                                                             |
| Complete List of Authors:       | Jazayeri-Tehrani, Seyed Ali; Tehran University of Medical Sciences, Department of Clinical Nutrition<br>Rezayat, Seyed Mehdi; Tehran University of Medical Sciences (TUMS), Department of Pharmacology, School of Medicine, Member of Medical Nanotechnology Department, School of Advanced Sciences and Technology in Medicine<br>Mansouri, Siavash; National Iranian Oil Company (NIOC), Central Hospital Qorbani, Mostafa; Non communicable Diseases Research Center, Endocrinology and Metabolism Population Sciences Institute, Tehran University of Medical Sciences,<br>Alavian, SM; Baqiyatollah University of Medical Sciences, Tehran, Iran, Baqiyatallah Research Center for Gastroenterology and Liver Diseases (BRCGL)<br>Daneshi-Maskooni, Milad; Tehran University of Medical Sciences, Department of Community Nutrition<br>Hosseinzadeh-Attar, Mohammad Javad; Tehran University of Medical Sciences, Department of Clinical Nutrition |
| <b>Primary Subject Heading</b>: | Nutrition and metabolism                                                                                                                                                                                                                                                                                                                                                                                                                                                                                                                                                                                                                                                                                                                                                                                                                                                                                                                                |
| Secondary Subject Heading:      | Gastroenterology and hepatology, Complementary medicine                                                                                                                                                                                                                                                                                                                                                                                                                                                                                                                                                                                                                                                                                                                                                                                                                                                                                                 |
| Keywords:                       | Nanocurcumin, Non-Alcoholic Fatty Liver Disease, Trial Protocol, Overweight, Obesity                                                                                                                                                                                                                                                                                                                                                                                                                                                                                                                                                                                                                                                                                                                                                                                                                                                                    |
|                                 |                                                                                                                                                                                                                                                                                                                                                                                                                                                                                                                                                                                                                                                                                                                                                                                                                                                                                                                                                         |

SCHOLARONE™  
Manuscripts

# The Efficacy of Nanocurcumin Supplementation on Insulin Resistance, Lipids, Inflammatory Factors, and Nesfatin among Obese Patients with Non-Alcoholic Fatty Liver Disease (NAFLD): A Trial Protocol

**Running title:** Curcumin Effects on Obese NAFLD Patients: A Trial Protocol

Seyed Ali Jazayeri-Tehrani<sup>1</sup>, Seyed Mehdi Rezayat<sup>2</sup>, Siavash Mansouri<sup>3</sup>, Mostafa Qorbani<sup>4</sup>, Seyed Moayed Alavian<sup>5</sup>, Milad Daneshi-Maskooni<sup>6</sup>, Mohammad-Javad Hosseinzadeh-Attar<sup>7\*</sup>

1. MD, PhD Candidate in Nutritional Sciences, Department of Clinical Nutrition, School of Nutritional Sciences and Dietetics, Tehran University of Medical Sciences, Tehran, Iran. Email: [ajazayeri@farabi.tums.ac.ir](mailto:ajazayeri@farabi.tums.ac.ir)
2. Pharm.D, PhD, Professor of Pharmacology and Toxicology, Department of Pharmacology, School of Medicine, Member of Medical Nanotechnology Department, School of Advanced Sciences and Technology in Medicine, Tehran University of Medical Sciences (TUMS), Tehran, Iran. Email: [rezayat@tums.ac.ir](mailto:rezayat@tums.ac.ir), Phone: +989124708873, Telefax: +982122002040
3. MD, Gastroenterohepatologist, Assistant Professor, National Iranian Oil Company (NIOC) Central Hospital, Tehran, Iran. Email: [siavash.mansouri@gmail.com](mailto:siavash.mansouri@gmail.com)
4. PhD, Assistant Professor, Non-Communicable Diseases Research Center, Alborz University of Medical Sciences, Karaj, Iran. Email: [mqorbani1379@yahoo.com](mailto:mqorbani1379@yahoo.com)
5. MD, Hepatologist, Professor, Baqiyatallah Research Center for Gastroenterology and Liver Diseases (BRCGL), Baqiyatallah University of Medical Sciences, Tehran, Iran. Email: [alavian@thc.ir](mailto:alavian@thc.ir)
6. PhD Candidate in Nutritional Sciences, Department of Community Nutrition, School of Nutritional Sciences and Dietetics, Tehran University of Medical Sciences, Tehran, Iran. Email: [mi-daneshi@razi.tums.ac.ir](mailto:mi-daneshi@razi.tums.ac.ir)
7. \***Corresponding Author**, Professor, MD, PhD, Department of Clinical Nutrition, School of Nutritional Sciences and Dietetics, Tehran University of Medical Sciences, No.44, Hojjatdoust Alley, Naderi Ave, Keshavarz Blvd, Tehran, Iran. Email: [mhosseinzadeh@tums.ac.ir](mailto:mhosseinzadeh@tums.ac.ir), Phone: +989123717305, Telefax: +98-21-88974462

## Abstract

**Objectives:** Different studies have been conducted on the role of curcumin in health since having multiple properties, including antioxidant and anti-inflammatory effects. Due to the lack of studies regarding curcumin effects on obese NAFLD patients, our protocol was designed to assess nano-curcumin impacts on blood sugar, lipids, inflammatory indices, insulin resistance, and liver function, especially by nesfatin.

**Setting:** This trial will be conducted in the Oil Company central hospital of Tehran, Iran with a primary level of care.

**Participants:** 84 obese NAFLD patients diagnosed using ultrasonography will be employed according to the eligibility criteria.

**Interventions:** The patients will be randomly divided into the 2 equal groups (nanocurcumin and placebo, two 40-mg capsules, per/day with meals for three months, follow-up monthly). Also, lifestyle changes (low-calorie diet and physical activity) will be advised.

**Measures of the Primary and Secondary Outcomes:** A general questionnaire, 24-hr food recall (at the beginning, middle, and end), and short-form International Physical Activity Questionnaire (IPAQ) will be completed. Blood pressure, anthropometrics, serum sugar indices (fasting blood sugar and insulin [FBS, FBI], insulin resistance and sensitivity, and glycosylated hemoglobin [HbA1c]), lipids (triglycerid [TG], total cholesterol [TC], and low- and high-density lipoprotein-cholesterol [LDL-c, HDL-c]), inflammatory profiles (interleukin-6 [IL-6] and tumor necrosis factor-alpha [TNF- $\alpha$ ]), liver function (alanine and aspartate transaminase [ALT and AST]), and nesfatin will be measured at the beginning and end of the study.

**Conclusion:** This trial would be the first experiment to determine nanocurcumin efficacy on certain blood factors among obese patients with NAFLD. Nevertheless, studying the potential consequences of curcumin in various diseases, especially NAFLD, is required for a clinical use.

**Trial registration:** Our protocol was approved by the Ethics Committee of Tehran University of Medical Sciences (IR.TUMS.REC.1395.2612). The trial characteristics registered at the Iranian Registry of Clinical Trials (IRCT) were as follows: IRCT2016071915536N3 and 27/12/2015.

**Keywords:** *nanocurcumin, Non-Alcoholic Fatty Liver Disease (NAFLD), trial protocol, overweight, obesity*

## A Summary on the Article

### *Strengths and limitations of this study:*

- Providing a randomized double-blinded design and protocol publication
- Determining dietary intake and physical activity statuses and registering any possible patient-reported problems
- Selecting a single and slow polyclinic recruitment of the patients to satisfy the eligibility criteria
- Self-reporting of the dietary intake and physical activity statuses and lack of cooperation of some participants to complete the intervention

## Introduction

Non-Alcoholic Fatty Liver Disease (NAFLD) occurs when triglyceride (TG) is deposited in liver cells. Intrahepatic triglyceride (IHTG) content of more than 5% of liver weight or volume or visible intracellular triglyceride content of 5% of hepatocytes or more are chemically or histologically defined as excessive IHTG or steatosis, respectively <sup>[1]</sup>. The 3 degrees of NAFLD are mild (<33% of fat accumulation), moderate (33-66% of fat accumulation), and severe (>66% of fat accumulation) <sup>[2]</sup>. The standard method of diagnosis is liver biopsy. Since biopsy is an invasive method, non-invasive diagnostic approaches, such as ultrasound examination, CT-scan, and MRI are mostly employed. However, it is difficult to exactly differentiate between the disease stages by these techniques. Most NAFLD patients are implicitly identified via elevated liver enzymes (Aminotransferases: ALT and AST contents of about 1.5-2 times higher than normal levels) in medical examinations. According to the recent studies, many patients with advanced non-alcoholic steatohepatitis (NASH) and even cirrhosis can have normal levels of liver enzymes <sup>[3-6]</sup>. Thus, NAFLD prevalence is probably more than what has been reported. Its symptoms often include fatigue and discomfort in the right upper quarter of the abdomen. Its average prevalence in adults is about 30% (nearly 65-85% and 15-20% in obese (BMI $\geq$ 25) and non-obese (BMI<25) patients, respectively) <sup>[7-11]</sup>. NAFLD is more common in men. The disease pathology is a two-phase event, including fat reposition in hepatocytes following hepatic steatosis and NASH. Insulin resistance has a key role in both phases, while oxidative stress and pro-inflammatory cytokines are the major irritants <sup>[12]</sup>. The common causes of macrovascular steatosis include insulin resistance, increasing blood insulin levels, central obesity, diabetes type 2, medications (e.g., glucocorticoid, estrogen, tamoxifen, and amiodarone), nutrition status (starvation, protein deficiency, and choline deficiency), liver diseases (Wilson's disease and chronic hepatitis C-III), Hindi child cirrhosis, and jejunum bypass <sup>[6]</sup>. Liver fat content is directly related to insulin resistance. Activation of nuclear factor kappa-light-chain-enhancer of activated B cells (NF- $\kappa$ B) upregulates the production of pro-inflammatory cytokines that influence on the insulin activity. Thus, inflammation, adipokines, oxidative stress, or lipid metabolites can change insulin sensitivity, but intrahepatic fat content is not necessarily directly related to any of them <sup>[1]</sup>. Age, family history, malnutrition, severe weight loss, gastrointestinal tract infection, certain medication, and some diseases, such as inflammatory bowel disease are the other risk factors of

1  
2  
3 NAFLD [13-15]. In some studies, the disease incidence has been related to the high intakes of  
4 saturated fats or carbohydrates [16,17]. Some patients have normal weights although they may have  
5 abdominal obesity and insulin resistance [18,19].  
6  
7  
8

9  
10 Nesfatin as a neuropeptide secreted by the hypothalamus in mammals is involved in the  
11 regulation of appetite and body fat stores. Nesfatin gene is expressed in other locations, such as  
12 brain, pancreas, endocrine cells of stomach, and adipocytes. Nesfatin gene expression is  
13 activated by Peroxisome Proliferator-Activated Receptors (PPARs), especially PPAR $\gamma$ . Nesfatin  
14 plays an important role in glucose metabolism, phosphorylation of certain signaling proteins, and  
15 increasing insulin sensitivity in the liver, particularly through AMP-activated protein kinase  
16 (AMPK) [20,21]. In a recent study, the serum levels of nesfatin in overweight/obese NAFLD  
17 patients with an age of 30-60 years were found to be significantly lower than those of the healthy  
18 group [21].  
19  
20  
21  
22  
23  
24  
25

26  
27 A common treatment for NAFLD is changing the lifestyle (gradual weight loss and  
28 increasing physical activity) that can improve liver enzymes, fat reposition, inflammation, and  
29 fibrosis [22-27]. It seems that changes in the dietary ingredients can be presented as a therapy  
30 method for these patients [28,29] since losing weight and its maintenance for a long period of time  
31 is a hard task [30]. Accordingly, assessment of the relationship between NAFLD and certain  
32 nutrients or dietary ingredients is very important.  
33  
34  
35  
36

37  
38 Different studies have been conducted on the roles of curcumin in health. Curcumin as a  
39 turmeric spice of ginger family has multiple properties, including antioxidant, anti-inflammatory,  
40 antimicrobial, and anti-carcinogenic effects [31-38]. Due to the importance of PPARs in the  
41 metabolic pathways, numerous studies have been carried out to investigate curcumin effects on  
42 PPARs, especially on PPAR $\gamma$  gene expression. It increases both the activity and expression of  
43 PPAR $\gamma$ , which is important for inhibiting inflammation and oxidative stress as the main factors  
44 of insulin resistance and NAFLD [39-42].  
45  
46  
47  
48  
49

50  
51 NAFLD prevalence and implications are increasing. Due to the lack of any drugs for it  
52 and the role of nutrition (weight loss and changing food components associated with increased  
53 physical activity) as the key factor of treatment, assessment of the effects of some food  
54 components like curcumin as a polyphenol on NAFLD improvement can further help to find new  
55  
56  
57  
58  
59  
60

ways of treatment. Curcumin plays numerous metabolic roles in the improvement of insulin resistance through its antioxidant, anti-inflammatory, hypolipidemic, and antimicrobial effects. Despite the multiple benefits of curcumin for health, it has a very low stability and bioavailability that affect its efficacy in therapy. Recently, many approaches have been assessed to improve its stability and bioavailability by using polymeric nanoparticles named nanocurcumin. For example, PLGA nanoparticles can increase curcumin bioavailability up to 22 times <sup>[43]</sup>. Hence, in this study, nanocurcumin was applied. Fat accumulation in the liver, inflammation, and oxidative stress result in NAFLD onset and progression, which may be improved by curcumin. NAFLD exacerbates with overweight or obesity; yet, no human studies have been conducted on curcumin effects on them. Thus, this study aimed to assess the effects of curcumin on blood glucose, lipid, inflammatory profiles, liver function (fatty liver degree, ALT, and AST), and insulin resistance (HOMA-IR and QUICKI), especially through nesfatin in obese NAFLD patients.

## Methods

### *Study design*

In this research, a double-blind randomized clinical trial will be performed.

### *Objectives*

1. Comparing the subjects' economic, occupational, and marital statuses, as well as education levels with nanocurcumin and placebo supplementations before the intervention
1. Comparing the means of serum triglyceride, LDL-cholesterol, total cholesterol, HDL-cholesterol, Fasting Blood Sugar (FBS), insulin (FBI), hemoglobin-A1c, insulin resistance, sensitivity indices (HOMA-IR, QUICKI), TNF- $\alpha$ , IL-6, hs-CRP, and nesfatin within each group and between the two groups before and after the intervention
2. Comparing the means of weight, waist circumference, Body Mass Index (BMI), body composition percentage, and systolic and diastolic blood pressures within each group and between the two groups before and after the intervention

3. Comparing the means of physical activity score and energy intakes, micronutrients, and macronutrients within each group and between the two groups before and after the intervention
4. Comparing the means of age and height between the two groups before the intervention

#### ***Inclusion criteria***

1. Age: 25-50 years
2. Overweight/obesity ( $25 \leq \text{BMI} < 35$ )
3. NAFLD diagnosis by a radiologist based on the ultrasound test
4. An informed consent

#### ***Exclusion criteria***

1. A history of alcohol consumption during the last 12 months based on personal admission
2. Regular intakes of nonsteroidal anti-inflammatory drugs, antibiotics, and corticosteroids during the last 6 months
3. Misuses of narcotics, psychotropic medication, and cigarettes over the last 6 months
4. Intakes of anti-secretory drugs causing acholoridy, amiodarone, valproate, prednisone, tamoxifen, perhexiline, and methotrexate, liver fat-inducing drugs, hormone drugs, statins, antihypertensives, and ursodeoxycholic acid (UDCA) during the last 6 months
5. Intakes of supplements, such as probiotics, multivitamins/minerals, antioxidants, and omega-3 at least twice a week during the study or the last 3 months
6. Diagnosis of pathological conditions affecting the liver, such as viral hepatitis, acute or chronic liver failure, cholestasis, liver transplantation, acute systemic disease, cystic fibrosis disease, muscular dystrophy, previous gastrointestinal surgery, neurological disorders, structural abnormalities of the gastrointestinal tract, diabetes, heart failure, thyroid disorders, kidney diseases, respiratory failure, psychological disorders, hereditary hemochromatosis, Wilson's disease, alpha-1 antitrypsin deficiency, autoimmune diseases, celiac disease, and any types of malignancy
7. Rapid weight loss, Total Parenteral Nutrition (TPN), and protein malnutrition over the last 6 months
8. NAFLD secondary causes, such as drugs, surgical procedures, and environmental toxins



- 1
  - 2
  - 3
  - 4
  - 5
  - 6
  - 7
  - 8
  - 9
  - 10
  - 11
  - 12
  - 13
  - 14
  - 15
  - 16
  - 17
  - 18
  - 19
  - 20
  - 21
  - 22
  - 23
  - 24
  - 25
  - 26
  - 27
  - 28
  - 29
  - 30
  - 31
  - 32
  - 33
  - 34
  - 35
  - 36
  - 37
  - 38
  - 39
  - 40
  - 41
  - 42
  - 43
  - 44
  - 45
  - 46
  - 47
  - 48
  - 49
  - 50
  - 51
  - 52
  - 53
  - 54
  - 55
  - 56
  - 57
  - 58
  - 59
  - 60
9. Conditions leading to physical disability
  10. Uncontrolled hypertension (>140/90 mmHg)
  11. Breastfeeding, pregnancy, or a plan for pregnancy in the next 3 months
  12. Being a professional athlete or doing regular exercise
  13. Taking no more than 10% of the prescription supplements

### ***Subjects***

The patients will be referred to a major executor after being diagnosed by a radiologist if meeting the eligibility criteria at the central hospital of the polyclinic of National Iranian Oil Company (NIOC), Tehran, Iran. At the beginning, all the study details will be clarified and an informed consent form will be provided. Then, a general questionnaire, the short form of IPAQ, and 24-hour food recall questionnaire will be filled by the interviewer. The necessary lifestyle changes, including a low-calorie diet (weight loss of 0.5-1 kg per week based on BMI during the trial) and increased physical activity (aerobic exercise of moderate intensity about 30-45 min at least 3 times a week) will be prescribed. Anthropometrics, including weight, height, and waist circumference will be measured using a digital scale, stadiometer, and non-elastic tape, respectively. Weight without shoes and minimum clothing with an accuracy of 100 g, height in a standing position without shoes with heels stuck to the wall and head looking frontwards with an accuracy of 0.5 cm, and waist circumference in the middle of the last rib and the iliac crest with minimal clothing with an accuracy of 0.5 cm will be measured.

The questionnaire of 24-hour food recall will be completed at the beginning, middle, and end of the study. Blood pressure will be measured with a manometer (cuff in two-thirds of the upper right arm) after 10 min of resting in a sitting position at the beginning and end of the study. At both the beginning and end of the intervention, 10 ml of blood will be taken from the brachial vein to measure the mentioned factors. Finally, these measurements will be privately presented to the patients.

### ***Sample size***

According to Chuengsamarn et al. [2012], the mean  $\pm$  standard deviation of HOMA-IR index in the curcumin and placebo groups were  $3.22 \pm 1.30$  and  $4.08 \pm 1.35$ , respectively [44].

1  
2  
3 The sample size was 42 patients in each group with a Confidence Interval (CI) of 95%, power of  
4 80%, and loss of 15%. A total of 84 patients will be invited and divided into two equal groups by  
5 using the block randomization method as follows:  
6  
7

- 8  
9 1. 42 overweight/obese NAFLD patients with nanocurcumin supplement and advice on lifestyle  
10 changes (a weight loss diet and increase of physical activity) for 3 months of intervention  
11
- 12 2. 42 overweight/obese NAFLD patients with the placebo supplement and advice on lifestyle  
13 changes (a weight loss diet and increase of physical activity) for 3 months of intervention  
14  
15

### 16 17 ***Intervention and randomization*** 18

19  
20 The block randomization method was used to divide the patients into two equal groups.  
21 Age and gender distributions will be controlled using a stratified randomization. The  
22 supplementation ratio is 1:1 for the groups in this study. An assistant performed the block  
23 randomization and the intervention allotment will be blinded to the investigator and patients. The  
24 subjects will be randomly allocated into the two groups of taking nanocurcumin and placebo  
25 supplements. The supplements offered in A and B packages will be blinded to the investigators  
26 and participants.  
27  
28

29  
30 No side effects and toxicity caused by taking 210 mg of nanocurcumin have been  
31 reported [34]. The supplementation dose of Sinacurcumin is 80 mg/day (two 40-mg capsules per  
32 day according to company's order: 1 capsule with breakfast and one with dinner). Sinacurcumin  
33 and placebo supplements will be prepared by Exir-nanosina Pharmaceutical Company. The  
34 placebo supplement contained polysorbate 80, soy oil, purified water, sorbitol 70, methyl  
35 paraben, and propyl paraben associated with nanocurcumin particles.  
36  
37

38  
39 Curcumin is of a very low stability and bioavailability. It is hardly dissolved in water,  
40 rapidly metabolized, and very weakly absorbed in the intestine so that it remains at a very low  
41 level in plasma. Human studies have shown that a daily consumption of 12 g of curcumin is safe.  
42 Less than 1% of curcumin taken enters the bloodstream to be mostly metabolized in the liver.  
43 Today, new ways are being investigated to enhance curcumin bioavailability, especially through  
44 polymeric nanoparticles called nanocurcumin. Poly-Lactic-co-Glycolic Acid (PLGA) as a  
45 nanoparticle can augment curcumin bioavailability in mice up to 22 times [43].  
46  
47  
48  
49  
50  
51  
52  
53  
54  
55  
56  
57  
58  
59  
60

1  
2  
3 The supplements will be distributed on a monthly basis, while any possible complications  
4 regarding the numbers of ingested capsules and packets given back will be recorded. Also, the  
5 study progress will be pursued by calling the subjects once a week.  
6  
7  
8

### 9 *Lifestyle changes*

10  
11 A low-calorie diet for a weight loss of 0.5-1 kg/week based on the BMI and increased  
12 physical activity will be presented as the lifestyle changes by a qualified dietician present in the  
13 central hospital of the polyclinic of National Iranian Oil Company (NIOC), Tehran, Iran.  
14  
15  
16

### 17 *Assessments and measurements*

18  
19 The ultrasound test will be done by a radiologist after 12 h of fasting. The measurements  
20 of blood lipids (TC, HDL, LDL, and TG) and liver enzymes (ALT and AST) will be determined  
21 using special kits and Hitachi analyzer (or BT-3500) device after 12 h of fasting. Blood sugar  
22 (FBS) is determined using the glucose oxidase method. Fasting insulin (FBI) and glycated  
23 hemoglobin (HbA1c) will be measured via electrochemiluminescence (ECL) application using  
24 *co base e411*<sup>®</sup> analyzer device and immunoturbidimetric method. Insulin resistance and  
25 sensitivity indices (HOMA and QUICKI) are calculated according to the following formula:  
26  
27  
28  
29

$$30 \text{ QUICKI} = 1 / (\log (\text{FBI } \mu\text{U/mL}) + \log (\text{FBS mg/dL}))$$

$$31 \text{ HOMA1-IR} = (\text{FBI (mU/l)} \times \text{FBS (mmol/l)}) / 22.5$$

32  
33 The serum inflammatory markers (IL-6, TNF- $\alpha$ , and hs-CRP) and nesfatin will be  
34 determined using the ELISA method (sandwich ELISA format) and specific kits. The ELISA test  
35 will be done using Elisa washer (Combiwash Human<sup>®</sup>) and bioElisa reader devices (biokit<sup>®</sup> EL<sub>x</sub>  
36 800).  
37  
38

39  
40 Food intake status at the beginning, middle, and end of the study and physical activity at  
41 the beginning and end of the study will be investigated using the questionnaire of 24-hour food  
42 recall and the short form of IPAQ. The dietary intakes will thus be examined and controlled. The  
43 body composition percentage, including body fat and lean body mass will be determined using  
44 Bio-Impedance Analyzer (BIA) device (Tanita<sup>®</sup>).  
45  
46  
47  
48  
49  
50  
51  
52  
53  
54  
55  
56  
57  
58  
59  
60

1  
2  
3 At the beginning and end of the study, the systolic and diastolic blood pressures will be  
4 determined using a mercury manometer. The values are reported in mmHg. Waist circumference,  
5 weight, and height will be measured using a non-elastic tape, digital scale, and stadiometer,  
6 respectively. Weight with minimal clothing without shoes (100-g accuracy), height in a standing  
7 position without shoes with heels sticking to the wall and head keeping flat and looking forward  
8 (0.5-cm accuracy), and waist circumference at the middle of the last rib and the iliac crest with  
9 minimal clothing were measured at the beginning and end of the study. Blood taking, storage of  
10 blood samples, and performance of the lab tests will be conducted at the central hospital of the  
11 National Iranian Oil Company (NIOC), Tehran, Iran.  
12  
13  
14  
15  
16  
17  
18  
19

20 The details of enrolments, interventions, and assessments are presented in table 1.  
21 Furthermore, the SPIRIT checklist was completed in an additional file. The trial progress will be  
22 regularly and independently checked by an assistant.  
23  
24  
25

### 26 ***Data analysis***

27  
28 The data entry, coding, security, and saving will be checked. The data normality will be  
29 examined using a Kolmogorov-Smirnov test. Chi-square/nonparametric, Wilcoxon, ANCOVA,  
30 and Pearson's correlation coefficient statistical tests, as well as the T-test will be applied. A CI  
31 (Confidence Interval) of 95% will be considered in all the tests. The significance value is  
32 considered to be less than 0.05. Finally, SPSS statistical software will be applied to analyze the  
33 data.  
34  
35  
36  
37  
38  
39

### 40 ***Data accessibility***

41  
42 Accessibility to the ultimate dataset is only limited to the major investigator. The results  
43 will be presented only via publication.  
44  
45  
46

### 47 **Discussion**

48  
49 This is a novel study proposed for the first time with regard to the evaluation of  
50 nanocurcumin efficacy on various parameters, such as blood sugar, lipids, inflammatory  
51 markers, insulin resistance, and nesfatin among overweight/obese patients with NAFLD. It is of  
52 high relevance due to the various clinical uses of curcumin and lack of any studies related to its  
53  
54  
55  
56  
57

1  
2  
3 advantages or disadvantages in NAFLD patients. However, curcumin clinical practice for the  
4 treatment of some disorders needs to be investigated, while taking into account its possible  
5 prospective applications for several diseases, especially NAFLD. Due to the increasing values of  
6 obesity and NAFLD associated with significant alterations of some blood factors and the  
7 presence of few studies on nano-curcumin efficacy, the proposed research aimed to select these  
8 groups of patients as the most pertinent participants for intervention.  
9  
10  
11  
12  
13

14  
15 The strengths of the trial are using a randomized double-blind design and protocol  
16 publication, determining dietary and physical activity statuses, and registering any possible  
17 patient-reported problems.  
18  
19

20 The trial limitations are patients' slow recruitments and increase of the study period due  
21 to the multiple eligibility criteria, selection of a single polyclinic center, participants' self-  
22 reporting on the drugs and supplement consumptions, dietary intakes, and physical activities, and  
23 lack of cooperation of some participants to complete the intervention, which would lead to a  
24 replacement with other patients if the loss percentage will be more than expected.  
25  
26  
27  
28  
29

### 30 **Trial Status**

31 The patients' employments were continued at the time of the protocol submission.  
32  
33

### 34 **Abbreviations**

35  
36 NAFLD: non-alcoholic fatty liver disease, BMI: body mass index, NF- $\kappa$ B: nuclear factor kappa-  
37 light-chain-enhancer of activated B cells, TNF- $\alpha$ : tumor necrosis factor-alpha, PPAR:  
38 peroxisome proliferation activated receptor, HOMA-IR: homeostasis model assessment-insulin  
39 resistance, QUICKI: quantitative insulin sensitivity check index, IL-6: interleukin-6, hs-CRP:  
40 high-sensitivity C-reactive protein, TPN: total parenteral nutrition, CNS: central nervous system,  
41 IPAQ: international physical activity questionnaire, TC: total cholesterol, HDL-C: high density  
42 lipoprotein-cholesterol, LDL-C: low density lipoprotein-cholesterol, ALT: alanine transaminase,  
43 AST: aspartate transaminase, FBS: fasting blood sugar, FBI: fasting blood insulin, ELISA:  
44 enzyme-linked immunosorbent assay, ANCOVA: analysis of covariance  
45  
46  
47  
48  
49  
50  
51  
52

### 53 **Declaration**

#### 54 *Ethical Approval and Consent*

55  
56  
57  
58  
59  
60

1  
2  
3 The ethical approval of this trial was conducted by the ethics committee of Tehran  
4 University of Medical Sciences (Ethical Code: [IR.TUMS.REC.1395.2612](#)). All the participants  
5 will be completed an informed consent form in Persian. Participation in and continuation of the  
6 supplementation is free and voluntary for the patients. In the trial, advice on the lifestyle  
7 modification will be presented to the patients free of charge. The health care services of the  
8 hospital will be provided without inconsistency. The side effects of the supplements had not been  
9 previously published. The patients' personal information will be kept confidential.  
10  
11  
12  
13  
14  
15

### 16 ***Consent for publication***

17 Not applicable  
18  
19

### 20 ***Availability of supporting data***

21 Not applicable  
22  
23  
24

### 25 ***Competing interests***

26 There is no potential conflict of interests with respect to the research, authorship, and  
27 publication.  
28  
29  
30

### 31 ***Funding***

32 The trial funding was supported by Tehran University of Medical Sciences.  
33  
34  
35

### 36 ***Authors' contributions***

37 SAJT, MJHA, and SMR conceived and developed the idea for the study and revised the  
38 manuscript. SM, SMA, and MDM contributed to the data collection. MDM wrote numerous  
39 drafts on the study. MQ contributed to the statistical interpretations. And ultimately, all the  
40 authors read and approved the final manuscript.  
41  
42  
43  
44  
45

### 46 ***Consent to publish***

47 Not applicable  
48  
49

### 50 ***Acknowledgement***

51 The supports of Tehran University of Medical Sciences and cooperation of the central  
52 hospital of the National Iranian Oil Company (NIOC), Tehran, Iran are acknowledged.  
53  
54  
55  
56  
57

## References

- [1]. Fabbrini E, Sullivan Sh, Klein S. Obesity and Nonalcoholic Fatty Liver Disease: Biochemical, Metabolic and Clinical Implications. *Hepatology*. 2010 February; 51(2): 679–689. doi:10.1002/hep.23280.
- [2]. Nalbantoglu I, Blunt EM. Role of liver biopsy in nonalcoholic fatty liver disease. *World Journal of Gastroenterology*. 2014; 20(27): 9026-9037.
- [3]. Rinella ME. Nonalcoholic fatty liver disease: a systematic review. *Jama*. 2015 Jun 9;313(22):2263-73.
- [4]. Wei Y, Rector RS, Thyfault JP, Ibdah JA. Nonalcoholic fatty liver disease and mitochondrial dysfunction. *World J Gastroenterol* 2008; 14(2): 193-199. <http://dx.doi.org/10.3748/wjg.14.193>.
- [5]. Dowman JK, Tomlinson JW, Newsome PN. Systematic review: the diagnosis and staging of non-alcoholic fatty liver disease and non-alcoholic steatohepatitis. *Aliment Pharmacol Ther* 2011; 33: 525–540.
- [6]. Kasper D, Fauci A, Hauser S, Longo D, Jameson J, Loscalzo J. *Harrison's principles of internal medicine*, 19e. McGraw-hill; 2015.
- [7]. Amirkalali B, Poustchi H, Keyvani H, Khansari MR, Ajdarkhosh H, Maadi M, et al. Prevalence of Non-Alcoholic Fatty Liver Disease and Its Predictors in North of Iran. *Iranian J Publ Health* 2014; 43(9): 1275-1283.
- [8]. Bagheri Lankarani K, Ghaffarpasand F, Mahmoodi M, Lotfi M, Zamiri N, Heydari ST, et al. Non Alcoholic Fatty Liver Disease in Southern Iran: A Population Based Study. *Hepat Mon*. 2013; 13(5): e9248.
- [9]. Karimi-Sari H, Mousavi-Naeini SM, Ramezani-Binabaj M, Najafizadeh-Sari S, Mir-Jalili AH, Dolatimehr F. Prevalence of Non-Alcoholic Fatty Liver Disease in Morbidly Obese Patients Undergoing Sleeve Bariatric Surgery in Iran and Association with Other Comorbid Conditions. *Jundishapur J Chronic Dis Care*. 2015 April; 4(2): e25128. doi: 10.5812/jjcdc.25128.
- [10]. Adibi A, Jaberzadeh-Ansari M, Dalili AR, Omidifar N, Sadeghi M. Association between Nonalcoholic Fatty Liver Disease (NAFLD) and Coronary Artery Disease (CAD) in Patients with Angina Pectoris. *Open Journal of Medical Imaging* 2013; 3: 97-101. doi:10.4236/ojmi.2013.33015.
- [11]. Nishioji K, Sumida Y, Kamaguchi M, Mochizuki N, Kobayashi M, Nishimura T, Yamaguchi K, Itoh Y. Prevalence of and risk factors for non-alcoholic fatty liver disease in a non-obese Japanese population, 2011–2012. *Journal of gastroenterology*. 2015 Jan 1;50(1):95-108. doi 10.1007/s00535-014-0948-9.
- [12]. Sahebkar AH. Potential efficacy of ginger as a natural supplement for nonalcoholic fatty liver disease. *World J Gastroenterol* 2011 January 14; 17(2): 271-272. doi:10.3748/wjg.v17.i2.271.
- [13]. National Guideline Centre (UK). *Non-Alcoholic Fatty Liver Disease: Assessment and Management*. London: National Institute for Health and Care Excellence (UK); 2016 Jul. (NICE Guideline, No. 49.) 5, Risk factors for NAFLD. Available from: <https://www.ncbi.nlm.nih.gov/books/NBK384735/>
- [14]. Ma YY, Li L, Yu CH, Shen Z, Chen LH, Li YM. Effects of probiotics on nonalcoholic fatty liver disease: A meta-analysis. *World J Gastroenterol* 2013 October 28; 19(40): 6911-6918. doi:10.3748/wjg.v19.i40.6911.
- [15]. Lau E, Carvalho D, Freitas P. Gut Microbiota: Association with NAFLD and Metabolic Disturbances. *BioMed Research International* 2015. Article ID 979515.
- [16]. Asrih M, Jornayvaz FR. Diets and nonalcoholic fatty liver disease: the good and the bad. *Clinical Nutrition*. 2014 Apr 30;33(2):186-90.
- [17]. Than NN, Newsome PN. A concise review of non-alcoholic fatty liver disease. *Atherosclerosis*. 2015 Mar 31;239(1):192-202.
- [18]. Assy N, Nasser G, Kamayse I, Nseir W, Beniashvili Z, Djibre A, Grosovski M. Soft drink consumption linked with fatty liver in the absence of traditional risk factors. *Can J Gastroenterol*. 2008; 22: 811-816.



- 1  
2  
3  
4  
5  
6  
7  
8  
9  
10  
11  
12  
13  
14  
15  
16  
17  
18  
19  
20  
21  
22  
23  
24  
25  
26  
27  
28  
29  
30  
31  
32  
33  
34  
35  
36  
37  
38  
39  
40  
41  
42  
43  
44  
45  
46  
47  
48  
49  
50  
51  
52  
53  
54  
55  
56  
57  
58  
59  
60
- [19]. Yasutake K, Nakamuta M, Shima Y, Ohyama A, Masuda K, Haruta N, and et al. Nutritional investigation of non-obese patients with non-alcoholic fatty liver disease: the significance of dietary cholesterol. *Scand J Gastroenterol.* 2009; 44: 471-477.
- [20]. Ayada C, Toru Ü, Korkut Y. Nesfatin-1 and its effects on different systems. *Hippokratia.* 2015 Jan;19(1):4.
- [21]. Basar O, Akbal E, Koklu S, Kocak E, Tuna Y, Ekiz F, Gultuna S, Yiotalmaz FM, Aydogan T. A novel appetite peptide, nesfatin-1 in patients with nonalcoholic fatty liver disease. *Scand J Clin Lab Invest.* 2012; 72(6): 479-483. doi: 10.3109/00365513.2012.699097.
- [22]. Shadab Siddiqui M, Sanyal AJ. Nonalcoholic fatty liver disease. *Yamada's Atlas of Gastroenterology.* 2016:428-35. doi: 10.1002/9781118512104.ch53
- [23]. Brunt EM, Wong VW, Nobili V, Day CP, Sookoian S, Maher JJ, Bugianesi E, Sirlin CB, Neuschwander-Tetri B, Rinella ME. Nonalcoholic fatty liver disease. *Nature reviews. Disease primers.* 2014 Dec; 1:15080-15080. doi: 10.1038/nrdp.2015.80.
- [24]. Fusillo S, Rudolph B. Nonalcoholic fatty liver disease. *Pediatrics in review/American Academy of Pediatrics.* 2015 May;36(5):198-205.
- [25]. Day CP, Anstee QM. Nonalcoholic Fatty Liver Disease. *Semin Liver Dis* 2015; 35(03): 203-206. doi: 10.1055/s-0035-1562941.
- [26]. Thrasher T, Abdelmalek MF. Nonalcoholic Fatty Liver Disease. *North Carolina medical journal.* 2016 May 1;77(3):216-9.
- [27]. Shah K, Stufflebam A, Hilton TN, Sinacore DR, Klein S, Villareal DT. Diet and exercise interventions reduce intrahepatic fat content and improve insulin sensitivity in obese older adults. *Obesity.* 2009; 17: 2162-2168.
- [28]. Zelber-Sagi S, Ratziu V, Oren R. Nutrition and physical activity in NAFLD: An overview of the epidemiological evidence. *World J Gastroenterol.* 2011; 17(29): 3377-3389.
- [29]. Eslamparast T, Eghtesad S, Poustchi H, Hekmatdoost A. Recent advances in dietary supplementation in treating non-alcoholic fatty liver disease. *World J Hepatol* 2015 February 27; 7(2): 204-212. doi: 10.4254/wjh.v7.i2.204
- [30]. Katan MB. Weight-loss diets for the prevention and treatment of obesity. *N Engl J Med,* 2009. 360: 923-925.
- [31]. Chauhan M, Saha S, Roy A. Curcumin: a review. *Journal of Applied Pharmaceutical Research (JOAPR).* 2014 Feb 15;2(1):18-28.
- [32]. Anand P, Sundaram C, Jhurani S, Kunnumakkara AB, Aggarwal BB. Curcumin and cancer: an "old-age" disease with an "ageold" solution. *Cancer Lett* 2008; 267(1): 133-64.
- [33]. Ganjali S, Sahebkar A, Mahdipour E, Jamialahmadi K, Torabi S, Akhlaghi S, Ferns G, Parizadeh SM, Ghayour-Mobarhan M. Investigation of the effects of curcumin on serum cytokines in obese individuals: a randomized controlled trial. *The Scientific World Journal.* 2014 Feb 11;2014. Article ID: 898361, 6 pages. doi: 10.1155/2014/898361.
- [34]. Kanai M, Imaizumi A, Otsuka Y, Sasaki H, Hashiguchi M, Tsujiko K, Matsumoto S, Ishiguro H, Chiba T. Dose-escalation and pharmacokinetic study of nanoparticle curcumin, a potential anticancer agent with improved bioavailability, in healthy human volunteers. *Cancer chemotherapy and pharmacology.* 2012 Jan 1;69(1):65-70. doi: 10.1007/s00280-011-1673-1.
- [35]. Panahi Y, Sahebkar A, Parvin S, Saadat A. A randomized controlled trial on the anti-inflammatory effects of curcumin in patients with chronic sulphur mustard-induced cutaneous complications. *Annals of clinical biochemistry.* 2012 Nov;49(6):580-8. doi: 10.1258 /acb.2012.012040.
- [36]. Roghani Dehkordi F, Roghani M, Baluchnejadmojarad T. The effect of curcumin on serum level of aspartate and alanine aminotransferase and cardiac level of oxidative stress markers in diabetic rats. *Pejouhandeh* 2012;17(1):18-25.
- [37]. Shehzad A, Ha T, Subhan F, Lee YS. New mechanisms and the anti-inflammatory role of curcumin in obesity and obesity-related metabolic diseases. *European journal of nutrition.* 2011 Apr 1;50(3):151-61. doi: 10.1007/s00394-011-0188-1.



- 1  
2  
3  
4  
5  
6  
7  
8  
9  
10  
11  
12  
13  
14  
15  
16  
17  
18  
19  
20  
21  
22  
23  
24  
25  
26  
27  
28  
29  
30  
31  
32  
33  
34  
35  
36  
37  
38  
39  
40  
41  
42  
43  
44  
45  
46  
47  
48  
49  
50  
51  
52  
53  
54  
55  
56  
57  
58  
59  
60
- [38]. Um MY, Hwang KH, Ahn J, Ha TY. Curcumin Attenuates Diet-Induced Hepatic Steatosis by Activating AMP-Activated Protein Kinase. *Basic & clinical pharmacology & toxicology*. 2013 Sep 1;113(3):152-7. doi: 10.1111/bcpt.12076.
- [39]. Pescosolido N, Giannotti R, Plateroti AM, Pascarella A, Nebbioso M. Curcumin: therapeutical potential in ophthalmology. *Planta medica*. 2014 Mar;80(04):249-54.
- [40]. Abdallah Ismail N, Ragab S, Abd El Baky ANE, Hamed M, Ahmed Ibrahim AS. Effect of Oral Curcumin Administration on Insulin Resistance, Serum Resistin and Fetuin-A in Obese Children: Randomized Placebo-Controlled Study. *Research Journal of Pharmaceutical, Biological and Chemical Sciences* 2014; 5(1): 887-896.
- [41]. Jacob A, Wu R, Zhou M, Wang P. Mechanism of the anti-inflammatory effect of curcumin: PPAR- $\gamma$  activation. *PPAR research*. 2008 Jan 17;2007. Article ID: 89369. 5 pages. doi:10.1155/2007/89369.
- [42]. Liu ZJ, Liu W, Liu L, Xiao C, Wang Y, Jiao JS. Curcumin protects neuron against cerebral ischemia-induced inflammation through improving PPAR-gamma function. *Evidence-Based Complementary and Alternative Medicine*. 2013 May 16;2013. Article ID: 470 975: 10 pages. doi: 10.1155/2013/470975.
- [43]. Kamali E, Ghaedi K, Karimi P, Kheradmand P, Tavassoli M. Biological and Anticancer Effects of Curcumin. *J Isfahan Med Sch* 2014; 31(265): 2097-112.
- [44]. Chuengsamarn S, Rattanamongkolgul S, Luechapudiporn R, Phisalaphong C, Jirawatnotai S. Curcumin Extract for Prevention of Type 2 Diabetes. *Diabetes Care* 35:2121–2127, 2012.

**Table 1.** Contents of enrolments, interventions, and assessments.

| Trial Contents           | STUDY PERIOD    |            |                 |                 |               |               |
|--------------------------|-----------------|------------|-----------------|-----------------|---------------|---------------|
|                          | Enrolment       | Allocation | Post-allocation |                 |               | Close-out     |
| TIMEPOINT                | -t <sub>1</sub> | 0          | +1 Month        | +1.5<br>Monthes | +2<br>Monthes | +3<br>Monthes |
| <b>ENROLMENTS:</b>       |                 |            |                 |                 |               |               |
| Eligibility screen       | X               |            |                 |                 |               |               |
| Informed consent         | X               | X          |                 |                 |               |               |
| General questionnaire    |                 | X          |                 |                 |               |               |
| 24hour food recall       |                 | X          |                 | X               |               | X             |
| SF-IPAQ questionnaire    |                 | X          |                 |                 |               | X             |
| Anthropometrics          |                 | X          |                 |                 |               | X             |
| Other questionnaires     |                 | X          |                 |                 |               | X             |
| Blood taking             |                 | X          |                 |                 |               | X             |
| Allocation               |                 | X          |                 |                 |               |               |
| <b>INTERVENTIONS:</b>    |                 |            |                 |                 |               |               |
| [Intervention A]         |                 | X          | X               |                 | X             |               |
| [Intervention B]         |                 | X          | X               |                 | X             |               |
| <b>ASSESSMENTS:</b>      |                 |            |                 |                 |               |               |
| Dietary status           |                 | X          |                 | X               |               | X             |
| Blood pressure           |                 | X          |                 |                 |               | X             |
| Inflammatory factors     |                 | X          |                 |                 |               | X             |
| Lipid profile            |                 | X          |                 |                 |               | X             |
| Blood sugar indices      |                 | X          |                 |                 |               | X             |
| Nesfatin                 |                 | X          |                 |                 |               | X             |
| Physical activity status |                 | X          |                 |                 |               | X             |
| Anthropometrics          |                 | X          |                 |                 |               | X             |
| Socioeconomic status     |                 | X          |                 |                 |               |               |

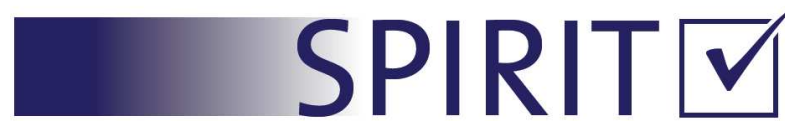

STANDARD PROTOCOL ITEMS: RECOMMENDATIONS FOR INTERVENTIONAL TRIALS

SPIRIT 2013 Checklist: Recommended items to address in a clinical trial protocol and related documents\*

| Section/item                      | Item No | Description                                                                                                                                                                                                                                                                              | Addressed on page number |
|-----------------------------------|---------|------------------------------------------------------------------------------------------------------------------------------------------------------------------------------------------------------------------------------------------------------------------------------------------|--------------------------|
| <b>Administrative information</b> |         |                                                                                                                                                                                                                                                                                          |                          |
| Title                             | 1       | Descriptive title identifying the study design, population, interventions, and, if applicable, trial acronym                                                                                                                                                                             | 1                        |
| Trial registration                | 2a      | Trial identifier and registry name. If not yet registered, name of intended registry                                                                                                                                                                                                     | 2                        |
|                                   | 2b      | All items from the World Health Organization Trial Registration Data Set                                                                                                                                                                                                                 | -                        |
| Protocol version                  | 3       | Date and version identifier                                                                                                                                                                                                                                                              | 2                        |
| Funding                           | 4       | Sources and types of financial, material, and other support                                                                                                                                                                                                                              | 14                       |
| Roles and responsibilities        | 5a      | Names, affiliations, and roles of protocol contributors                                                                                                                                                                                                                                  | 1, 14                    |
|                                   | 5b      | Name and contact information for the trial sponsor                                                                                                                                                                                                                                       | -                        |
|                                   | 5c      | Role of study sponsor and funders, if any, in study design; collection, management, analysis, and interpretation of data; writing of the report; and the decision to submit the report for publication, including whether they will have ultimate authority over any of these activities | 14                       |
|                                   | 5d      | Composition, roles, and responsibilities of the coordinating centre, steering committee, endpoint adjudication committee, data management team, and other individuals or groups overseeing the trial, if applicable (see Item 21a for data monitoring committee)                         | -                        |
| <b>Introduction</b>               |         |                                                                                                                                                                                                                                                                                          |                          |
| Background and rationale          | 6a      | Description of research question and justification for undertaking the trial, including summary of relevant studies (published and unpublished) examining benefits and harms for each intervention                                                                                       | 3, 4, 5                  |
|                                   | 6b      | Explanation for choice of comparators                                                                                                                                                                                                                                                    | -                        |
| Objectives                        | 7       | Specific objectives or hypotheses                                                                                                                                                                                                                                                        | 6                        |

|                                                                     |     |                                                                                                                                                                                                                                                                                                                                                                                |             |
|---------------------------------------------------------------------|-----|--------------------------------------------------------------------------------------------------------------------------------------------------------------------------------------------------------------------------------------------------------------------------------------------------------------------------------------------------------------------------------|-------------|
| Trial design                                                        | 8   | Description of trial design including type of trial (eg, parallel group, crossover, factorial, single group), allocation ratio, and framework (eg, superiority, equivalence, non-inferiority, exploratory)                                                                                                                                                                     | 2, 6, 9, 10 |
| <b>Methods: Participants, interventions, and outcomes</b>           |     |                                                                                                                                                                                                                                                                                                                                                                                |             |
| Study setting                                                       | 9   | Description of study settings (eg, community clinic, academic hospital) and list of countries where data will be collected. Reference to where list of study sites can be obtained                                                                                                                                                                                             | 8, 11       |
| Eligibility criteria                                                | 10  | Inclusion and exclusion criteria for participants. If applicable, eligibility criteria for study centres and individuals who will perform the interventions (eg, surgeons, psychotherapists)                                                                                                                                                                                   | 7           |
| Interventions                                                       | 11a | Interventions for each group with sufficient detail to allow replication, including how and when they will be administered                                                                                                                                                                                                                                                     | 9, 10       |
|                                                                     | 11b | Criteria for discontinuing or modifying allocated interventions for a given trial participant (eg, drug dose change in response to harms, participant request, or improving/worsening disease)                                                                                                                                                                                 | 11          |
|                                                                     | 11c | Strategies to improve adherence to intervention protocols, and any procedures for monitoring adherence (eg, drug tablet return, laboratory tests)                                                                                                                                                                                                                              | 11          |
|                                                                     | 11d | Relevant concomitant care and interventions that are permitted or prohibited during the trial                                                                                                                                                                                                                                                                                  | 9, 10, 11   |
| Outcomes                                                            | 12  | Primary, secondary, and other outcomes, including the specific measurement variable (eg, systolic blood pressure), analysis metric (eg, change from baseline, final value, time to event), method of aggregation (eg, median, proportion), and time point for each outcome. Explanation of the clinical relevance of chosen efficacy and harm outcomes is strongly recommended | 11          |
| Participant timeline                                                | 13  | Time schedule of enrolment, interventions (including any run-ins and washouts), assessments, and visits for participants. A schematic diagram is highly recommended (see Figure)                                                                                                                                                                                               | 10, 11      |
| Sample size                                                         | 14  | Estimated number of participants needed to achieve study objectives and how it was determined, including clinical and statistical assumptions supporting any sample size calculations                                                                                                                                                                                          | 9           |
| Recruitment                                                         | 15  | Strategies for achieving adequate participant enrolment to reach target sample size                                                                                                                                                                                                                                                                                            | 9           |
| <b>Methods: Assignment of interventions (for controlled trials)</b> |     |                                                                                                                                                                                                                                                                                                                                                                                |             |
| Allocation:                                                         |     |                                                                                                                                                                                                                                                                                                                                                                                |             |
| Sequence generation                                                 | 16a | Method of generating the allocation sequence (eg, computer-generated random numbers), and list of any factors for stratification. To reduce predictability of a random sequence, details of any planned restriction (eg, blocking) should be provided in a separate document that is unavailable to those who enrol participants or assign interventions                       | 10          |

|                                                           |     |                                                                                                                                                                                                                                                                                                                                                                                                              |           |
|-----------------------------------------------------------|-----|--------------------------------------------------------------------------------------------------------------------------------------------------------------------------------------------------------------------------------------------------------------------------------------------------------------------------------------------------------------------------------------------------------------|-----------|
| Allocation concealment mechanism                          | 16b | Mechanism of implementing the allocation sequence (eg, central telephone; sequentially numbered, opaque, sealed envelopes), describing any steps to conceal the sequence until interventions are assigned                                                                                                                                                                                                    | 11        |
| Implementation                                            | 16c | Who will generate the allocation sequence, who will enrol participants, and who will assign participants to interventions                                                                                                                                                                                                                                                                                    | 9, 10, 11 |
| Blinding (masking)                                        | 17a | Who will be blinded after assignment to interventions (eg, trial participants, care providers, outcome assessors, data analysts), and how                                                                                                                                                                                                                                                                    | 10        |
|                                                           | 17b | If blinded, circumstances under which unblinding is permissible, and procedure for revealing a participant's allocated intervention during the trial                                                                                                                                                                                                                                                         | 10        |
| <b>Methods: Data collection, management, and analysis</b> |     |                                                                                                                                                                                                                                                                                                                                                                                                              |           |
| Data collection methods                                   | 18a | Plans for assessment and collection of outcome, baseline, and other trial data, including any related processes to promote data quality (eg, duplicate measurements, training of assessors) and a description of study instruments (eg, questionnaires, laboratory tests) along with their reliability and validity, if known. Reference to where data collection forms can be found, if not in the protocol | 11        |
|                                                           | 18b | Plans to promote participant retention and complete follow-up, including list of any outcome data to be collected for participants who discontinue or deviate from intervention protocols                                                                                                                                                                                                                    | 9         |
| Data management                                           | 19  | Plans for data entry, coding, security, and storage, including any related processes to promote data quality (eg, double data entry; range checks for data values). Reference to where details of data management procedures can be found, if not in the protocol                                                                                                                                            | 12        |
| Statistical methods                                       | 20a | Statistical methods for analysing primary and secondary outcomes. Reference to where other details of the statistical analysis plan can be found, if not in the protocol                                                                                                                                                                                                                                     | 12        |
|                                                           | 20b | Methods for any additional analyses (eg, subgroup and adjusted analyses)                                                                                                                                                                                                                                                                                                                                     | 12        |
|                                                           | 20c | Definition of analysis population relating to protocol non-adherence (eg, as randomised analysis), and any statistical methods to handle missing data (eg, multiple imputation)                                                                                                                                                                                                                              | -         |
| <b>Methods: Monitoring</b>                                |     |                                                                                                                                                                                                                                                                                                                                                                                                              |           |
| Data monitoring                                           | 21a | Composition of data monitoring committee (DMC); summary of its role and reporting structure; statement of whether it is independent from the sponsor and competing interests; and reference to where further details about its charter can be found, if not in the protocol. Alternatively, an explanation of why a DMC is not needed                                                                        | 14        |
|                                                           | 21b | Description of any interim analyses and stopping guidelines, including who will have access to these interim results and make the final decision to terminate the trial                                                                                                                                                                                                                                      | -         |

|                                 |     |                                                                                                                                                                                                                                                                                     |        |
|---------------------------------|-----|-------------------------------------------------------------------------------------------------------------------------------------------------------------------------------------------------------------------------------------------------------------------------------------|--------|
| Harms                           | 22  | Plans for collecting, assessing, reporting, and managing solicited and spontaneously reported adverse events and other unintended effects of trial interventions or trial conduct                                                                                                   | 11     |
| Auditing                        | 23  | Frequency and procedures for auditing trial conduct, if any, and whether the process will be independent from investigators and the sponsor                                                                                                                                         | 12     |
| <b>Ethics and dissemination</b> |     |                                                                                                                                                                                                                                                                                     |        |
| Research ethics approval        | 24  | Plans for seeking research ethics committee/institutional review board (REC/IRB) approval                                                                                                                                                                                           | 13, 14 |
| Protocol amendments             | 25  | Plans for communicating important protocol modifications (eg, changes to eligibility criteria, outcomes, analyses) to relevant parties (eg, investigators, REC/IRBs, trial participants, trial registries, journals, regulators)                                                    | -      |
| Consent or assent               | 26a | Who will obtain informed consent or assent from potential trial participants or authorised surrogates, and how (see Item 32)                                                                                                                                                        | 7, 9   |
|                                 | 26b | Additional consent provisions for collection and use of participant data and biological specimens in ancillary studies, if applicable                                                                                                                                               | -      |
| Confidentiality                 | 27  | How personal information about potential and enrolled participants will be collected, shared, and maintained in order to protect confidentiality before, during, and after the trial                                                                                                | 14     |
| Declaration of interests        | 28  | Financial and other competing interests for principal investigators for the overall trial and each study site                                                                                                                                                                       | 14     |
| Access to data                  | 29  | Statement of who will have access to the final trial dataset, and disclosure of contractual agreements that limit such access for investigators                                                                                                                                     | 12     |
| Ancillary and post-trial care   | 30  | Provisions, if any, for ancillary and post-trial care, and for compensation to those who suffer harm from trial participation                                                                                                                                                       | -      |
| Dissemination policy            | 31a | Plans for investigators and sponsor to communicate trial results to participants, healthcare professionals, the public, and other relevant groups (eg, via publication, reporting in results databases, or other data sharing arrangements), including any publication restrictions | 12     |
|                                 | 31b | Authorship eligibility guidelines and any intended use of professional writers                                                                                                                                                                                                      | -      |
|                                 | 31c | Plans, if any, for granting public access to the full protocol, participant-level dataset, and statistical code                                                                                                                                                                     | -      |
| <b>Appendices</b>               |     |                                                                                                                                                                                                                                                                                     |        |

|                            |    |                                                                                                                                                                                                |              |
|----------------------------|----|------------------------------------------------------------------------------------------------------------------------------------------------------------------------------------------------|--------------|
| Informed consent materials | 32 | Model consent form and other related documentation given to participants and authorised surrogates                                                                                             | - (In Farsi) |
| Biological specimens       | 33 | Plans for collection, laboratory evaluation, and storage of biological specimens for genetic or molecular analysis in the current trial and for future use in ancillary studies, if applicable | 12           |

\*It is strongly recommended that this checklist be read in conjunction with the SPIRIT 2013 Explanation & Elaboration for important clarification on the items. Amendments to the protocol should be tracked and dated. The SPIRIT checklist is copyrighted by the SPIRIT Group under the Creative Commons "[Attribution-NonCommercial-NoDerivs 3.0 Unported](#)" license.

For peer review only
